1 An anti-diuretic hormone receptor in the human disease  
2 vector, *Aedes aegypti*: identification, expression analysis  
3 and functional deorphanization

4

5 **Authors:**

6 Farwa Sajadi, Ali Uyklu, Christine Paputis, Aryan Lajevardi, Azizia Wahedi, Lindsay Taylor Ber,  
7 Andreea Matei and Jean-Paul V. Paluzzi\*

8

9 **Affiliation:**

10 Department of Biology, York University, 4700 Keele Street, Toronto, Ontario, M3J 1P3, Canada.

11

12 **\* Corresponding Author:**

13 E-mail: [paluzzi@yorku.ca](mailto:paluzzi@yorku.ca)

14 Phone: (416) 736-2100 ext. 20999

15 Lumbers Building, Room 221

16 Department of Biology, York University,

17 4700 Keele Street, Toronto, Ontario, M3J 1P3, Canada.

18

19 **Keywords:**

20 CAPA; CAP2b; G protein-coupled receptor; Malpighian tubules; anti-diuresis; DH<sub>31</sub>; mosquito natriuretic  
21 hormone

22

23

24 **Significance**

25 Insects are by far the most successful and abundant group of organisms on earth. As a result of their small  
26 size, insects have a relatively large surface area to volume ratio, raising the potential for rapid gain or loss  
27 of water, ions and other molecules including toxins – a phenomenon that applies to insects living in both  
28 aquatic and terrestrial environments. In common with many other organisms, hormones are key regulators  
29 of the excretory system in insects, and numerous factors control the clearance of excess water and ions  
30 (i.e. diuretics) or retention of these elements (i.e. anti-diuretics). Here we characterized an endogenous  
31 anti-diuretic hormone receptor in the human disease vector, *Aedes aegypti*, demonstrating its expression is  
32 highly enriched in the Malpighian ‘renal’ tubules and is necessary for eliciting anti-diuretic control of this  
33 key component of the mosquito excretory system.

34

35

36 **Abstract**

37 Insect CAPA neuropeptides, which are homologs of mammalian neuromedin U, have been described in  
38 various insect species and are known to influence ion and water balance by regulating the activity of the  
39 Malpighian ‘renal’ tubules (MTs). A number of diuretic hormones have been shown to increase primary  
40 fluid and ion secretion by the insect MTs and, in the adult female mosquito, a calcitonin-related peptide  
41 (DH<sub>31</sub>) also known as mosquito natriuretic peptide, increases sodium secretion at the expense of  
42 potassium to remove the excess salt load acquired upon blood-feeding. An endogenous mosquito anti-  
43 diuretic hormone was recently described, having inhibitory activity against select diuretic factors and  
44 being particularly potent against DH<sub>31</sub>-stimulated diuresis. In the present study, we have functionally  
45 deorphanized, both *in vitro* and *in vivo*, a mosquito anti-diuretic hormone receptor (*AedaeADHr*).  
46 Expression analysis by quantitative PCR indicates the receptor is highly enriched in the MTs, and  
47 fluorescent *in situ* hybridization confirms expression within principal cells. Characterization using a  
48 heterologous system demonstrated the receptor was highly sensitive to mosquito CAPA peptides. In adult  
49 females, *AedaeADHr* transcript knockdown using RNAi led to the abolishment of CAPA-peptide induced  
50 anti-diuretic control of DH<sub>31</sub>-stimulated MTs. The neuropeptidergic ligand is produced within a pair of  
51 neurosecretory cells in each of the six abdominal ganglia, whose axonal projections innervate the  
52 abdominal neurohaemal organs (known as the perivisceral organs), where these neurohormones are  
53 released into the open circulatory system of the insect. Furthermore, pharmacological inhibition of  
54 PKG/NOS signalling abolished the anti-diuretic activity of *AedaeCAPA-1*, which collectively confirms  
55 the role of cGMP/PKG/NOS in this anti-diuretic signalling pathway.

## 56 **Introduction**

57           Neuropeptides are central regulators of behaviours and control a plethora of physiological  
58 processes in all eukaryotic organisms. Insects, like many other animals, contain a comprehensive  
59 repertoire of neuropeptides along with their cognate receptors, which are essential for controlling complex  
60 biological phenomena including circadian rhythms, diapause, development, reproduction, pheromone  
61 biosynthesis, metabolism, circulation, stress as well as hydromineral balance<sup>1-10</sup>. Insects have a high  
62 surface area to volume ratio, which has implications for their ability to maintain levels of water and ions  
63 within a normal homeostatic range. In order to ensure their survival, most insects have a relatively  
64 ‘simple’ excretory system comprised of the Malpighian ‘renal’ tubules (MTs) and hindgut (ileum and  
65 rectum). The MTs produce the primary urine acting to clear the haemolymph of excess ions, metabolites  
66 and toxins while the hindgut generally functions in reabsorptive processes eliminating any unintentional  
67 loss of essential ions and amino acids<sup>11,12</sup>. The insect excretory system is under complex control, which  
68 may include direct innervation and regulation by neurotransmitters such as proctolin, as observed in the  
69 hindgut of many insects<sup>13,14</sup>. The excretory system in insects is also under the control by various  
70 circulating hormones<sup>15,16</sup>, which is the sole mechanism of extrinsic control in the non-innervated MTs,  
71 while endocrine factors may also influence the hindgut<sup>4</sup>.

72           The overwhelming majority of studies investigating regulators of the insect excretory system  
73 have focused on diuretic regulators of the MTs<sup>17-25</sup>, with only a few studies characterizing factors  
74 responsible for controlling reabsorptive processes across hindgut epithelia<sup>12,26-30</sup>. In addition, a few anti-  
75 diuretic factors that inhibit primary urine secretion by the insect MTs have also been reported<sup>31-36</sup>, acting  
76 to counter the activity of the diuretic hormones that increase ion and water secretion rates. We recently  
77 identified an endogenous anti-diuretic hormone in the disease-vector mosquito, *Aedes aegypti*, that  
78 strongly inhibits select diuretic factors including the mosquito natriuretic peptide (a calcitonin-related  
79 diuretic hormone)<sup>37</sup>, which is critical for the post-prandial sodium-rich diuresis that follows blood gorging  
80 by adult females<sup>22</sup>. Similarly, anti-diuretic activity of CAPA neuropeptides has been reported earlier in

81 larval *A. aegypti*<sup>36</sup> as well as in other insects<sup>31,38-42</sup>, with signalling involving cGMP as a second  
82 messenger<sup>31,37,40,42,43</sup>. In addition to their clear anti-diuretic roles, CAPA peptides have also been linked to  
83 desiccation, where desiccation stress in *Drosophila melanogaster* leads to upregulation of *capa* mRNA,  
84 which is suggested to elevate CAPA levels in the CNS<sup>44</sup>. In many insects, CAPA peptides act through a  
85 conserved nitridergic signalling pathway leading to increased fluid secretion by MTs<sup>44,24</sup>. The mosquito  
86 anti-diuretic hormone is a member of the CAPA peptide family, which along with other insect PRXamide  
87 peptides, share homology to the vertebrate neuromedin U peptides<sup>45</sup>. CAPA neuropeptides are most  
88 abundant in specialized neurosecretory ventral abdominal (Va) neurons<sup>46-49</sup> of the abdominal ganglia (or  
89 in the analogous neuromeres in insects with fused abdominal ganglia)<sup>50,51</sup> and stored within abdominal  
90 perivisceral organs<sup>52-55</sup>, which are major neurohaemal organs facilitating neurohormone release into  
91 circulation for delivery to target organs expressing receptors.

92 In the present study, we utilized a combination of molecular tools, heterologous functional assays,  
93 physiological bioassays and reverse genetics techniques to identify and unravel the functional role of an  
94 anti-diuretic hormone receptor in the disease-vector mosquito, *A. aegypti*. Our data provides further  
95 evidence that mosquito CAPA neuropeptides, together with their cognate receptor identified herein,  
96 function in a neuroendocrine system halting the stimulatory activity of diuretic hormones that, if left  
97 unregulated, may compromise ion and water homeostasis in this important anthropophilic mosquito.

## 98 Materials and Methods

99 **Animals and dissections.** Various stages of *A. aegypti* (Liverpool strain) were obtained from a laboratory  
100 colony maintained as described previously<sup>56</sup>. All mosquitoes were raised under a 12:12 light-dark cycle  
101 regime. Whole insects at each post-embryonic stage were used for examining developmental expression  
102 profiles and dissected tissues and organs were isolated from adults of each sex that were four-days post-  
103 eclosion. Adults were immobilized with brief exposure to carbon dioxide and then dissected to isolate  
104 individual organs using fine forceps (Fine Science Tools, North Vancouver, British Columbia, Canada)  
105 under nuclease-free Dulbecco's phosphate-buffered saline (DPBS) at room temperature (RT).

106 **Immunohistochemistry.** The dissected tissues/organs were fixed overnight at 4°C with 4%  
107 paraformaldehyde prepared in DPBS and were then washed several times with DPBS to remove fixative.  
108 The tissues were subsequently permeabilized in 4% Triton X-100, 10% normal sheep serum (NSS) and  
109 2% bovine serum albumin (BSA) prepared in DPBS and incubated for 1 hour at RT on a rocking platform  
110 and then washed several times with DPBS to remove any traces of the permeabilization solution. The  
111 primary antibody was prepared using a custom affinity-purified rabbit polyclonal antibody (Genscript,  
112 Piscataway, NJ) produced against *Rhodnius prolixus* RhoprCAPA-2 (EGGFISFPRV-NH<sub>2</sub>; a kind gift  
113 from Prof. Ian Orchard, University of Toronto), which was diluted in 0.4% Triton X-100 containing 2%  
114 NSS and 2% BSA in DPBS. The stock antibody was diluted 1:1000 for stand-alone  
115 immunohistochemistry; however, when fluorescence *in situ* hybridization (FISH) preceded  
116 immunohistochemistry, the antibody was diluted 1:500 in the aforementioned solution. Tissues were  
117 incubated in the primary antibody solution for 48 hours at 4°C on a rocking platform, and no primary  
118 controls were incubated in the same solution of 0.4% Triton X-100 containing 2% BSA and 2% NSS in  
119 DPBS, but lacking primary antibody. After the primary antibody incubation, tissues were washed three  
120 times for one hour each with DPBS at RT. The secondary antibody solution was prepared using either  
121 FITC-conjugated sheep anti-rabbit immunoglobulin G (Jackson ImmunoResearch Laboratories, West  
122 Grove, PA) or Alexa Fluor 488-conjugated cross-adsorbed goat anti-rabbit immunoglobulin G (Life

123 Technologies, Burlington, ON) diluted 1:200 in DPBS containing 10% NSS. The tissues were incubated  
124 in the secondary antibody solution overnight at 4°C on a rocking platform and were then washed with  
125 DPBS several times at RT. Tissues were mounted in ProLong Diamond Antifade Mountant containing  
126 DAPI (Molecular Probes, Eugene, OR) onto microscope slides and analyzed using a Lumen Dynamics  
127 XCite™ 120Q Nikon fluorescence microscope (Nikon, Mississauga, ON, Canada) or EVOS FL Auto  
128 Live-Cell Imaging System (Life Technologies, Burlington, ON).

### 129 **Determination of the complete cDNA of an *A. aegypti* anti-diuretic hormone receptor.**

130 The *Anopheles gambiae* CAPA receptor identified previously<sup>57</sup> was used as a query for Megablast  
131 screening of the *A. aegypti* genomic scaffold database available locally on a lab computer running  
132 Geneious® 6.1.8 (Biomatters Ltd, Auckland, New Zealand) and the highest scoring hits (mapping within  
133 supercontig1.1) were assembled and predicted introns were excised. Using the Primer3 module in  
134 Geneious® 6.1.8, gene-specific oligonucleotides targeting this region (see Table S1) were designed to  
135 amplify this predicted partial fragment using Q5 High Fidelity DNA Polymerase (New England Biolabs,  
136 Whitby, On) with whole adult female *A. aegypti* cDNA as template. The PCR product was purified, A-  
137 tailed, cloned into pGEM-T vector (Promega, Madison, WI, USA) and nucleotide sequence was  
138 confirmed by Sanger sequencing (Center for Applied Genomics, Hospital for Sick Children, Toronto,  
139 ON). After successful validation of the cloned partial sequence, primers were designed (as described  
140 above) to perform 5' and 3' rapid amplification of cDNA ends (RACE)-PCR utilizing the Clontech  
141 SMARTer 5'/3' RACE Kit (Takara BIO USA Inc, CA, USA) as recently described<sup>58</sup>. To facilitate cloning  
142 of amplicons, the linker sequence GATTACGCCAAGCTT, which overlaps with the pRACE vector  
143 provided in the RACE kit, was added to the 5' ends of the gene-specific primers (Table 1). First-strand  
144 cDNA synthesis was prepared using 1µg total RNA from whole adult female mosquitoes using the 3'  
145 CDS primer (provided in the kit) and a gene-specific reverse primer to generate template cDNA for 5'  
146 RACE. Nested PCR reactions utilized gene-specific forward (3' RACE) and reverse (5' RACE) primers  
147 (see Table S1) and a universal primer mix (UPM) to amplify the complete cDNA encoding *A. aegypti*

148 CAPAr with optimal cycling parameters determined empirically. Specifically, for both 5' and 3' RACE  
149 this included an initial denaturation at 94°C for 1 min, followed by 40 cycles of 30 s at 94°C, 30 s  
150 at 68°C, and 3 min at 72°C to amplify PCR products using SeqAmp DNA Polymerase. Following  
151 three rounds of nested PCR amplification using gene-specific primers, the amplicons were separated on a  
152 1% agarose gel, extracted and cloned into the linearized pRACE vector. Plasmid DNA was isolated using  
153 a Monarch plasmid miniprep kit (New England Biolabs, Whitby, ON) and several clones were sent for  
154 sequencing for sequence validation. Finally, primers were designed at the 5' and 3' ends of the complete  
155 cDNA sequence (including UTRs) and used for final PCR amplification of the full receptor cDNA with  
156 Q5 High Fidelity DNA polymerase to confirm base pair accuracy.

157 **Heterologous receptor functional activation bioluminescence assay.** The open reading frame of the  
158 cloned *A. aegypti* CAPAr was inserted into pcDNA3.1+ mammalian expression vector following  
159 procedures described previously<sup>58-60</sup>. Using a recombinant CHO-K1 cell line stably expressing aequorin<sup>61</sup>,  
160 *A. aegypti* CAPAr was transiently expressed following growth and transfection conditions as reported  
161 recently<sup>58</sup>. Cells were harvested for the functional assay at 48 hours post-transfection by detaching cells  
162 from the culture flask using 5mM EDTA in Dulbecco's PBS (DPBS; Wisent Corp., St. Bruno, QC) and  
163 later cells were resuspended at a concentration of 10<sup>6</sup>-10<sup>7</sup> cells/mL in assay media and incubated with  
164 coelenterazine *h* as described previously<sup>60</sup>. Prior to running the functional assay, cells were diluted 10-  
165 fold in assay media and left to incubate for one additional hour. Several endogenous as well as other  
166 insect neuropeptides representing a variety of neuropeptide families (see Table S2) were tested by  
167 preparing serial dilutions of each peptide in assay media. All peptides were commercially synthesized at a  
168 purity of >90% (Genscript, Piscataway, NJ) and 1mM stock solutions were prepared by dissolving 1mg of  
169 each peptide in water or DMSO as appropriate based on specific peptide characteristics. Recombinant  
170 CHO-K1 cells expressing the *A. aegypti* CAPAr were loaded into each well of multi-well plate using an  
171 automated injector module linked to a Synergy 2 Multi Mode Microplate Reader (BioTek, Winooski, VT)  
172 which measured kinetic luminescent response from each well for 20 sec immediately following cell



173 loading onto the different peptides at various doses. Data was compiled in Microsoft Excel and analyzed  
174 in GraphPad Prism 8.0 (GraphPad Software, San Diego, CA).

175 **RNA probe template preparation.** To obtain a template for synthesizing DIG-labelled RNA probes for  
176 use in FISH, a 373bp fragment of the *A. aegypti* CAPA partial mRNA (GenBank Accession:  
177 XM\_001650839) previously described<sup>50</sup> and a 743bp product of the anti-diuretic hormone receptor  
178 identified herein with primers designed (see Table S3) using the Primer3 plugin in Geneious® 6.1.8  
179 (Biomatters Ltd., Auckland, New Zealand) were amplified using standard Taq DNA Polymerase (New  
180 England Biolabs, Whitby, ON) following manufacturer- recommended conditions. PCR products were  
181 column-purified with PureLink Quick PCR Purification Kit (Life Technologies, Burlington, ON) and  
182 amplified in a subsequent PCR reaction to generate cDNA products with incorporated T7 promoter  
183 sequence (see Table S1) to facilitate *in vitro* RNA synthesis of anti-sense or sense probes. The final  
184 purified PCR products for use as templates for RNA probe synthesis were quantified on a SYNERGY 2  
185 Microplate reader (Biotek, Winooski, VT).

186 **Digoxigenin (DIG)-labelled RNA probe synthesis.** PCR templates generated as described above (see  
187 Table S3) were used for *in vitro* transcription reactions using the HiScribe T7 RNA Synthesis Kit (New  
188 England Biolabs, Whitby, ON) following the recommended conditions when using modified nucleotides.  
189 Digoxigenin-labelled UTP was supplemented in a 35:65 ratio (DIG-UTP to standard UTP) either as a  
190 separate analog (digoxigenin-11-UTP) or in a pre-mixed 10x DIG- RNA labelling mix (Sigma-Aldrich,  
191 Oakville, ON). Template DNA was removed following treatment with RNase-free DNase I (New  
192 England Biolabs, Whitby, ON) and an aliquot of the synthesized RNA probes were then visually assessed  
193 using standard agarose gel electrophoresis and quantified on a SYNERGY 2 Microplate reader (Biotek,  
194 Winooski, VT).

195 **Fluorescence *in situ* Hybridization (FISH).** An optimized FISH procedure based on a protocol  
196 described previously for *R. prolixus*<sup>62,63</sup> was utilized involving peroxidase-mediated tyramide signal

197 amplification to localize cells expressing either the CAPA peptide mRNA or the anti-diuretic hormone  
198 receptor (CAPAr) mRNA. Tissues/organs were dissected under nuclease-free Dulbecco's phosphate-  
199 buffered saline (DPBS; Wisent, St. Bruno, QC) and were immediately placed in microcentrifuge tubes  
200 containing freshly-prepared fixation solution (4% paraformaldehyde prepared in DPBS) and fixed for 1-2  
201 hours at RT or overnight at 4°C on a rocker. Tissues/organs were subsequently washed five times with  
202 0.1% Tween-20 in DPBS (PBT) and treated with 1% H<sub>2</sub>O<sub>2</sub> (diluted in DPBS) for 10-30 minutes at RT to  
203 quench endogenous peroxidase activity. Tissues/organs were then incubated in 4% Triton X-100 (Sigma  
204 Aldrich, Oakville, ON) in PBT for 1 hour at RT to permeabilize the tissues and then washed with copious  
205 PBT. A secondary fixation of the tissues/organs was performed for 20 minutes in 4% paraformaldehyde  
206 in DPBS and then washed using PBT to remove all traces of fixative. The tissues/organs were then rinsed  
207 in a 1:1 mixture of PBT-RNA hybridization solution (50% formamide, 5x SSC, 0.1 mg/mL heparin, 0.1  
208 mg/mL sonicated salmon sperm DNA and 0.1% Tween-20) which was then replaced with RT RNA  
209 hybridization that had been prepared earlier by denaturing in a boiling water bath for five minutes and  
210 subsequently cooled on ice for five minutes. The samples were then incubated at 56°C for 1-2 hours,  
211 which served as the pre-hybridization treatment. During the pre-hybridization incubation, labelled RNA  
212 probe (anti-sense for experimental or sense for control) was added to pre-boiled RNA hybridization  
213 solution (2-4ng/uL final concentration) and this mixture was heated at 80°C for 3 minutes to denature the  
214 single-stranded RNA probes and then cooled on ice for 5 minutes. The samples were then incubated  
215 overnight in this hybridization solution containing the DIG-labelled RNA probe at 56°C. The following  
216 day, samples were washed twice with fresh hybridization solution (minus probe) and subsequently with  
217 3:1, 1:1 and 1:3 (vol/vol) mixtures of hybridization solution-PBT (all pre-warmed to 56°C). The tissues  
218 were subsequently washed with PBT pre-warmed to 56°C and in the final wash step were left to  
219 equilibrate to RT. Next, to reduce non-specific staining, samples were blocked with PBTB (DPBS, 0.1%  
220 Tween-20, 1% Molecular Probes block reagent; Invitrogen, Carlsbad, CA) for one hour. Tissues/organs  
221 were then incubated with a mouse anti-DIG biotin-conjugated antibody (Jackson ImmunoResearch  
222 Laboratories, West Grove, PA) diluted 1:400 and incubated for 1.5hrs at RT on a rocker in the dark. The

223 antibody solution was then removed and tissues were subjected to several washes in PBTB over the  
224 course of one hour. Tissues/organs were then incubated with horseradish peroxidase-streptavidin  
225 conjugate (Molecular Probes, Eugene, OR) diluted 1:100 in PBTB for 1 hour and the tissues were once  
226 again washed with PBTB several times over the course of an hour. Finally, prior to treatment with  
227 tyramide solution for the signal amplification of the target mRNA transcripts, samples were washed twice  
228 with PBT and once with DPBS. Afterwards, a tyramide solution was prepared consisting of Alexa Fluor  
229 568 (or Alexa Fluor 647) tyramide dye in amplification buffer containing 0.015% H<sub>2</sub>O<sub>2</sub>. After  
230 experimenting with various dilutions of the labeled tyramide, a 1:100 and 1:500 dilution of tyramide dye  
231 gave optimal results with minimal background staining for the ganglia and MTs, respectively. After the  
232 last DPBS wash was removed from the tissues/organs, the tyramide solution was added and the tissues  
233 were incubated in the dark for 1 hour on a rocker at RT. The tyramide solution was then removed and the  
234 samples were washed with DPBS several times over the course of an hour. The tissues/organs were stored  
235 in DPBS overnight at 4°C and then mounted on cover slips with mounting media comprised of DPBS  
236 with 50% glycerol containing 4 µg/mL 4',6-diamidino-2-phenylindole dihydrochloride (DAPI). For  
237 preparations involving transcript and neuropeptide co-detection in the nervous system, following the  
238 tyramide treatment, neural tissues were washed several times with DPBS and then incubated with primary  
239 antibody following the immunohistochemistry protocol described above. Tissues/organs were analyzed  
240 using a Lumen Dynamics XCite™ 120Q fluorescence microscope (Nikon, Mississauga, ON, Canada) or  
241 EVOS FL Auto Live-Cell Imaging System (Life Technologies, Burlington, ON).

242 **Synthesis of dsRNA for RNA interference and RT-qPCR.** Double-stranded RNA (dsRNA) was  
243 synthesized and column-purified using the MEGAscript® RNAi Kit (Invitrogen, Carlsbad, CA) following  
244 the recommended protocol using primers for dsCAPAr synthesis (see Table S3) and primers as reported  
245 previously for dsARG<sup>64</sup>, which is an ampicillin resistance gene cloned from standard sequencing plasmid  
246 (pGEM T-Easy) that served as a negative control. A Nanoject Nanoliter Injector (Drummond Scientific,  
247 Broomall, PA) was used to inject one-day old female mosquitoes with 1µg (in ~140nL) of either

248 dsCAPAR or dsARG. After injection, mosquitoes were recovered in a photo period-, temperature- and  
249 humidity-controlled incubator. Total RNA was then isolated from four-day old whole female mosquitoes  
250 injected with dsCAPAR or dsARG using the Monarch Total RNA Miniprep Kit (New England Biolabs,  
251 Whitby, ON, Canada) and used as template (500ng) for cDNA synthesis using the iScript™ Reverse  
252 Transcription Supermix (Bio-Rad, Mississauga, ON, Canada) following recommended guidelines diluting  
253 cDNA ten-fold prior to quantitative RT-PCR. *AedaeCAPAR* and *AedaeCAPA* transcript levels were  
254 quantified using gene-specific primers that were positioned on different exons (see Table S3) and  
255 PowerUP™ SYBR® Green Master Mix (Applied Biosystems, Carlsbad, CA, United States) and measured  
256 on a StepOnePlus Real-Time PCR System (Applied Biosystems, Carlsbad, CA, United States) following  
257 conditions described previously<sup>59</sup>. A similar procedure for cDNA synthesis and transcript quantification  
258 as outlined above was followed for total RNA isolated from each post-embryonic developmental stage  
259 and tissues/organs dissected from adult stage mosquitoes. Relative expression levels were determined  
260 using the  $\Delta\Delta C_t$  method and were normalized to the geometric mean of *rp49* and *rps18* reference genes,  
261 which were previously characterized and determined as optimal endogenous controls<sup>30</sup>. Measurements  
262 were taken from three biological replicates, all of which included three technical replicates per reaction  
263 and a no-template negative control.

264 **Malpighian tubule fluid secretion assay.** In order to determine fluid secretion rates, a modified Ramsay  
265 secretion assay<sup>65</sup> was performed on isolated MTs of 3-6 day old adult female *A. aegypti*, as reported  
266 recently<sup>37</sup>. Tissue dissections were performed under physiological saline prepared as described  
267 previously<sup>66</sup> diluted 1:1 with Schneider's Insect Medium (Sigma-Aldrich, Oakville, ON). Individual MTs  
268 were removed and transferred to a Sylgard-lined Petri dish containing 20 $\mu$ l saline bathing droplets  
269 immersed in hydrated mineral oil to prevent evaporation. The proximal end of the MT was removed from  
270 the bathing saline and wrapped around a Minutem pin to allow for secretion measurements. Dosages of 25  
271 nmol l<sup>-1</sup> *DromeDH*<sub>31</sub><sup>22</sup> or 100 nmol l<sup>-1</sup> 5-HT<sup>67,68</sup> alone or in combination with 1 fmol l<sup>-1</sup> *AedaeCAPA-1*<sup>37</sup>  
272 were applied to the isolated MTs as previously described<sup>37</sup>. To investigate the effects of the

273 pharmacological blockers, a nitric oxide synthase (NOS) inhibitor, N<sub>ω</sub>-Nitro-L-arginine methyl ester  
274 hydrochloride (L-NAME), and protein kinase G (PKG) inhibitor, KT5823, were used against 5-HT- and  
275 DH<sub>31</sub>-stimulated MTs. Dosages of 2 μmol l<sup>-1</sup> L-NAME (manufacturer's recommended dose) and 5 μmol  
276 l<sup>-1</sup> KT5823<sup>36</sup> were applied to the MTs. The inhibitors were treated in conjunction with 1 fmol l<sup>-1</sup>  
277 *Aedae*CAPA-1 and/or 100 nmol l<sup>-1</sup> cyclic guanosine monophosphate, 8 bromo-cGMP (cGMP)<sup>37</sup> (Sigma-  
278 Aldrich, Oakville, ON, Canada). Unstimulated controls consisted of tubules bathed in physiological saline  
279 with no diuretic application. Following a 60-minute incubation period, the size of the secreted droplet was  
280 measured using an eyepiece micrometer and fluid secretion rate (FSR) was calculated as described  
281 previously<sup>21</sup>.

282

283

## 284 **Results**

285 **Anti-diuretic hormone receptor identification and sequence analysis.** The complete CAPA receptor in  
286 *A. aegypti* was identified and found to be 3461bp with an open reading frame of 2139bp encoding a  
287 receptor protein of 712 residues. The 5' and 3' untranslated regions were comprised of 899bp and 423bp,  
288 respectively (Figure S1A). The gene structure model revealed the cloned cDNA mapped to eleven exons  
289 spanning a genomic region of over 351Kb, with the start codon positioned within the third exon and the  
290 translation termination (stop) codon located in the eleventh exon, which is also contains the predicted  
291 polyadenylation signal at nucleotide position 3405-3410 (Figure S1B). The deduced protein sequence  
292 encodes a receptor protein that displays the prototypical features of rhodopsin receptor-like (family A)  
293 GPCRs<sup>69-71</sup>, including the highly conserved tryptophan residue in the first extracellular loop involved in  
294 receptor trafficking, the D/E-R-Y/F motif at the border between the third transmembrane domain and  
295 second intracellular loop along with the NSxxNPxxY motif found within the seventh transmembrane  
296 domain (Figure S1A). Phylogenetic analysis using maximum likelihood methods revealed the deduced  
297 receptor protein sequence shares greatest evolutionary relationship with the orthologous CAPA receptor  
298 proteins identified or predicted in other dipterans organisms, including for example the fruit fly, non-  
299 biting midges, house fly, blow fly along with the more closely-related sister mosquito species (Figure S2).

300 **Functional ligand-receptor interaction heterologous assay.** The endogenous peptidergic ligands for the  
301 cloned anti-diuretic hormone receptor were identified using a heterologous functional assay using CHO-  
302 K1 cells stably expressing a bioluminescent calcium sensor, aequorin<sup>58,61</sup>. The receptor was activated by  
303 all endogenously expressed peptides encoded by the CAPA gene in *A. aegypti* (Figure 1A), including two  
304 CAPA peptides (periviscerokinins) and a pyrokinin 1-related peptide. Notably however, the pyrokinin 1-  
305 related peptide displayed very poor activity compared to the two CAPA peptides, which were the most  
306 potent ligands with half maximal effective concentrations in the low nanomolar range ( $EC_{50} = 5.62-6.76$   
307 nM), whereas a significantly higher concentration of pyrokinin-1 was needed to achieve even low level  
308 CAPAr activation. Several other endogenous mosquito peptides as well as additional insect peptides

309 belonging to distinct peptide families were tested and displayed no detectable activity over background  
310 levels of luminescence (Figure 1B). Controls where the CHO-K1-aeq cells were transfected with empty  
311 pcDNA3.1<sup>+</sup> vector showed no detectable luminescence response (data not shown) to any of the peptides  
312 used in this study, confirming the calcium-based luminescence signal was a result of CAPA neuropeptide  
313 ligands activating the transiently expressed *A. aegypti* CAPA receptor.

314 **CAPAr transcript profile and cell-specific localization.** We determined the developmental expression  
315 profile of the *A. aegypti* CAPA receptor (*CAPAr*) transcript in each post-embryonic developmental stage  
316 of the mosquito. Over the four larval stages and pupal stage of development, the *CAPAr* transcript level  
317 remained unchanged (Figure 2A); however, in adults, *CAPAr* transcript levels were significantly higher in  
318 adult male mosquitoes compared to adult female, pupal stage and first instar larval mosquitoes (Figure  
319 2A). To confirm sites of biological action of the anti-diuretic hormones *in vivo*, we determined the *CAPAr*  
320 expression profile in adult *A. aegypti*, examining several tissues/organs in adult male and female  
321 mosquitoes. In males, *CAPAr* transcript was detected in reproductive tissues, head, carcass (i.e. the  
322 headless mosquito excluding the alimentary canal and reproductive tissues), midgut and low levels in the  
323 hindgut (Figure 2B). Enrichment of the *CAPAr* transcript was observed in the Malpighian ‘renal’ tubules  
324 (MTs) where expression was significantly enriched by ~150-fold compared to all other tissues/organs  
325 examined (Figure 2B). A similar expression profile was observed in female mosquitoes with *CAPAr*  
326 transcript present in head, carcass, midgut and low levels detected in hindgut and reproductive organs.  
327 Similar to males, *CAPAr* was significantly enriched in the MTs of females relative to all other examined  
328 tissues/organs by nearly 150-fold (Figure 2B). Using fluorescent *in situ* hybridization, the *CAPAr*  
329 transcript was localized specifically to principal cells of the MTs and absent in stellate cells (Figure 2C).  
330 Specificity of *CAPAr* transcript localization was confirmed using sense control probe, with no signal  
331 detected in any cell type of the MTs (Figure 2D).

332 **CAPA transcript and mature neuropeptide immunolocalization within the abdominal ganglia.**

333 CAPA-like immunoreactivity was localized within all six of the abdominal ganglia, including the

334 terminal ganglion. Specifically, each abdominal ganglion contains a pair of ventrally-localized strongly  
335 immunoreactive neurosecretory cells (Figure 3A). Axonal projections from these CAPA-like  
336 immunoreactive neurosecretory cells emanate dorsally and anteriorly within each ganglion, exiting via the  
337 median nerve (Figure 3B-C), with immunoreactive projections innervating the perivisceral organs (Figure  
338 3D), which are the primary neurohaemal release sites in the ventral nerve cord facilitating neurohormone  
339 delivery into the insect haemolymph<sup>72,73</sup>. Validation that these immunoreactive neurosecretory cells in the  
340 abdominal ganglia were indeed CAPA-producing neurons was established by co-localization of CAPA  
341 transcript with CAPA-like immunoreactivity. Weakly staining CAPA-like immunoreactive cells were  
342 also observed in other regions of the central nervous system, including the brain, suboesophageal  
343 ganglion and thoracic ganglia (Figure S3); however, CAPA transcript was significantly enriched (~140-  
344 fold) only within the abdominal ganglia but not in other regions of the nervous system (Figure S4).  
345 Within the abdominal ganglia, CAPA transcript co-localized within each pair of strongly staining CAPA-  
346 like immunoreactive neurosecretory cells (Figure 3F-H). Preparations treated with CAPA transcript sense  
347 probes did not detect any cells in the abdominal ganglia nor anywhere else in the central nervous system.

348 ***CAPAr* knockdown abolishes anti-diuretic hormone activity.** To confirm that the anti-diuretic  
349 hormone action of the CAPA neuropeptides<sup>36,37</sup> are mediated through this specific receptor expressed  
350 within the principal cells of the MTs, one day-old female *A. aegypti* were injected with ds*CAPAR* to  
351 knockdown *CAPAr* transcript levels. Relative to control mosquitoes injected with dsARG (gene cloned  
352 from standard plasmid vector encoding the ampicillin-resistance gene), *CAPAr* transcript was  
353 significantly reduced by ~75% in four-day old females (Figure 4A). With significant knockdown verified  
354 in four-day old adult mosquito samples from the same experimental cohort, standard Ramsay assay was  
355 conducted as previously described<sup>37</sup> on dsRNA-treated females to examine whether the anti-diuretic  
356 hormone activity of a CAPA anti-diuretic hormone was compromised. Our results confirmed that the  
357 CAPA neuropeptide, specifically *Aedae*CAPA-1, had no inhibitory activity against DH<sub>31</sub>-stimulated MTs  
358 in *CAPAr* knockdown females (Figure 4B). In contrast, *Aedae*CAPA-1 potently inhibited DH<sub>31</sub>-



359 stimulated fluid secretion by MTs in dsARG-treated control female mosquitoes (Figure 4B).

360 **Effect of pharmacological blockade on the inhibition of fluid secretion.** To further understand the  
361 anti-diuretic signalling pathway involving the CAPA neuroendocrine system, pharmacological blockers,  
362 including inhibitors of NOS (L-NAME) and PKG (KT5823), were tested against diuretic hormone-  
363 stimulated MTs alone and together with either *Aedae*CAPA-1 or cGMP. In DH<sub>31</sub>-stimulated MTs, L-  
364 NAME had no influence on the inhibitory effect of cGMP whereas the inhibitory effect of *Aedae*CAPA-1  
365 was abolished (Figure 5A). In 5-HT-stimulated MTs, the results indicate that neither *Aedae*CAPA-1 nor  
366 cGMP inhibition are influenced by L-NAME (Figure 5B). Application of KT5823 abolished the  
367 inhibitory effect of both cGMP and *Aedae*CAPA-1 in DH<sub>31</sub>-stimulated MTs (Figure 6A). Similarly, the  
368 inhibitory activity of *Aedae*CAPA-1 and cGMP on 5-HT-stimulated tubules was abolished when treated  
369 with KT5823 (Figure 6B). Collectively, these results indicate that *Aedae*CAPA-1 inhibits select diuretic  
370 factors acting on the principal cells and involves NO and cGMP as a second messenger in DH<sub>31</sub>-stimulated  
371 tubules, whereas cGMP, but not NO, is critical in the anti-diuretic activity of *Aedae*CAPA-1 on 5HT-  
372 stimulated MTs.

373

## 374 **Discussion**

375 Like many animals, insects must regulate the ionic and osmotic levels of their internal  
376 environment to ensure homeostatic levels of water and electrolytes are maintained. This is critical not  
377 only for challenges linked to feeding, including the intake of too much or too little water and/or ions, but  
378 is also important for daily exchange of these elements with the environment through other routes such as  
379 waste elimination or water loss during respiration. The insect excretory system acts to maintain  
380 hydromineral balance of the haemolymph by either increasing the removal of water and/or ions in excess  
381 or the recycling of these same elements when in short supply. The insect Malpighian ‘renal’ tubules  
382 (MTs) play a key role as the organ responsible for primary urine production, which can then be modified  
383 by downstream elements of the excretory system such as the hindgut<sup>4</sup>. The MTs are the chief iono- and

384 osmoregulatory organ and are under rigorous control by neuroendocrine factors, including both diuretic  
385 hormones (DH) and anti-diuretic hormones (ADH), which regulate transepithelial movement of ions and  
386 osmotically obliged water. These hormones consist of a variety of peptides as well as other  
387 neurochemicals produced by neurosecretory cells in the brain and ventral nerve cord<sup>74,75</sup>. Classically, DHs  
388 stimulate primary urine secretion by the MTs, whereas ADHs increase fluid reabsorption from the  
389 hindgut<sup>15,76</sup>. However, countless studies in diverse insect species have established that ADHs can also act  
390 on the MTs to reduce primary urine secretion<sup>31,36–38,40,77</sup>. CAPA neuropeptides have been demonstrated to  
391 display potent anti-diuretic effects in a variety of insects<sup>38,39,42,78</sup>, including *A. aegypti* mosquitoes<sup>36,37</sup>,  
392 while they have been shown to function as DHs and ADHs in *D. melanogaster*<sup>40,79–81</sup>.

393         The current study provides definitive evidence supporting the importance of this anti-diuretic  
394 hormone system in the disease vector mosquito, *A. aegypti*, by characterization and functional  
395 deorphanization of an anti-diuretic hormone receptor that is highly enriched in the MTs and demonstrates  
396 high selectivity for the mosquito CAPA neuropeptides. Previous studies have functionally deorphanized a  
397 number of CAPA receptor orthologs in other insects including dipterans<sup>44,57,82,83</sup>, lepidopterans<sup>84</sup>,  
398 coleopterans<sup>85</sup>, hemipterans<sup>86</sup>, as well as in the southern cattle tick<sup>87</sup>. Here, we have functionally validated  
399 the specific ligands of the elusive *A. aegypti* CAPA receptor demonstrating that two of the peptides  
400 encoded by the mosquito CAPA gene<sup>50</sup>, *Aedae*-CAPA1 and -CAPA2, potentially activate this receptor  
401 leading to calcium signalling that elicits a bioluminescent response. While none of the other tested ligands  
402 representing multiple insect peptide families were active on the mosquito CAPA receptor, the third  
403 peptide encoded by the CAPA gene, *Aedae*-PK1, had low agonist activity with a potency of over five  
404 orders of magnitude lower compared to the canonical CAPA ligands. *Aedae*-PK1 is a member of the  
405 pyrokinin-1 family of peptides that contain the GXWFGPRL-NH<sub>2</sub> (where normally X = V, M or L)  
406 consensus C-terminal sequence and recently a revised tryptopyrokinin nomenclature has been adopted to  
407 differentiate these neuropeptides from distinct pyrokinin families<sup>88</sup>. In agreement with our findings, a  
408 subset of previous studies on insect CAPA receptor orthologs have shown minor responsiveness to

409 tryptopyrokinin ligands, with high doses eliciting low level CAPA receptor activation<sup>84-86</sup>. Interestingly,  
410 this minor promiscuousness has not been observed for other dipteran CAPA receptors characterized  
411 previously<sup>57,82,83</sup>.

412           Members of the insect CAPA neuropeptide family are often also referred to as periviscerokinins  
413 due to their myotropic activity on visceral muscle and their source of release from the segmental  
414 abdominal neurohaemal organs known as perivisceral/perisymphathetic organs<sup>31,51,85</sup>. Herein, we have  
415 immunolocalized CAPA neuropeptides within a pair of ventral neurosecretory cells within each of the six  
416 abdominal ganglia, whose axonal projections extend dorsally and anteriorly exiting each abdominal  
417 ganglion via the median nerve. CAPA immunoreactivity extends towards and is localized to the  
418 abdominal neurohaemal organs, the perivisceral organs, where these neuropeptides can be released into  
419 the haemolymph to elicit their neurohormonal actions on target sites expressing the CAPA receptor. The  
420 CAPA transcript was highly enriched within the abdominal ganglia of adult mosquitoes, confirming the  
421 transcript encoding the anti-diuretic hormone prepropeptide colocalized to these same neurosecretory  
422 cells. In support of these findings, peptidomic approaches using MALDI-TOF mass spectrometry have  
423 previously provided evidence for the presence of putative CAPA neuropeptides within isolated abdominal  
424 ganglia, including the terminal ganglion, from adult *A. aegypti*<sup>50</sup>. Collectively, these findings establish  
425 that the transcript and the mature peptide are present within the adult mosquito abdominal ganglia with  
426 the neurohormones being released into the insect circulatory system to act upon target tissues. Lastly,  
427 considering the low level CAPA transcript and immunoreactivity detected in other regions of the nervous  
428 system indicates that the abdominal ganglia, and their associated neurohaemal organs, are the primary  
429 source of the anti-diuretic hormone in adult *A. aegypti*. This also corroborates earlier peptidomic studies  
430 indicating the absence CAPA peptides, or differential processing of the CAPA precursor, in other regions  
431 of the nervous system aside from the abdominal ganglia where these neuropeptides are highly  
432 abundant<sup>50,89,90</sup>.

433           Having established the origin of the CAPA neuropeptide anti-diuretic hormones and their potent

434 activity on the heterologously expressed CAPA receptor (CAPA-R), we next aimed to confirm the  
435 expression profile of the transcript encoding CAPA-R. Expression of *CAPAr* was observed in all post-  
436 embryonic ontogenic stages with significant enrichment in adult male mosquitoes, compared to females.  
437 Although the biological relevance of this differential expression remains unclear, this may relate to the  
438 sexual size dimorphism between adult male and female *A. aegypti*<sup>91</sup>, with the smaller males being  
439 inherently more susceptible to desiccation stress due to their higher surface area to volume ratio. In other  
440 insects, *CAPAr* transcript expression has been observed throughout most post-embryonic developmental  
441 stages<sup>82,85,92</sup>. The MTs are composed of two cell types forming a simple epithelium; large principal cells  
442 and thin stellate cells<sup>74</sup>. Principal cells facilitate the active transport of cations (Na<sup>+</sup> and K<sup>+</sup>) into the  
443 lumen of the MTs from the haemolymph, while the stellate cells facilitate the transepithelial secretion of  
444 Cl<sup>-</sup>, the predominant inorganic anion<sup>93</sup>. In adult stages, expression analysis of *CAPAr* verified significant  
445 enrichment of this receptor in the MTs in both male and female mosquitoes. Furthermore, cell-specific  
446 expression mapping confirmed that the *CAPAr* transcript is restricted to the principal cells of the MTs and  
447 absent in the smaller stellate cells. In other insects, *CAPAr* transcript has been detected in various regions  
448 of the alimentary canal<sup>85,86,94</sup>, including the principal cells of the MTs where this receptor is exclusively  
449 expressed in the fruit fly<sup>44</sup>. All in all, these observations are in line with physiological roles established for  
450 CAPA neuropeptides, which have been shown to modulate rates of fluid secretion by MTs in various  
451 insects<sup>36-37,41,62,96-97</sup>. In dipterans, these effects are mediated via action on the principal cells acting  
452 through a second messenger cascade involving calcium, nitric oxide and cGMP signalling<sup>98,99</sup>.

453 We next examined whether normal anti-diuretic hormone signalling, which requires the  
454 neuronally-derived CAPA peptide hormones activating their receptor expressed in the principal cells of  
455 the MTs, could be impeded by using RNA interference against the *CAPAr* transcript. One-day old  
456 mosquitoes were injected with *CAPAr*-targeted dsRNA resulting in knockdown at four-day old, where  
457 *CAPAr* transcript was significantly reduced. We examined whether *CAPAr* knockdown females retained  
458 sensitivity to CAPA peptides, which have been shown to inhibit fluid secretion by MTs by select diuretic

459 hormones<sup>37</sup>. Indeed, *CAPAr* knockdown abolished the anti-diuretic activity of a CAPA neuropeptide  
460 against MTs stimulated with *DromeDH*<sub>31</sub>, an analog of mosquito natriuretic peptide. Collectively, through  
461 RNAi-mediated knockdown, these findings confirm that mosquito anti-diuretic hormones, which belong  
462 to the CAPA peptide family, are produced in pairs of neurosecretory cells in each of the abdominal  
463 ganglia whereby they are released through the neurohaemal organs and influence the MTs by acting on  
464 their receptor expressed within the principal cells of this organ. Further, the results confirm that sustained  
465 anti-diuretic hormone signalling, which requires the steady state expression of ligand and receptor, is  
466 necessary for facilitating the anti-diuretic control of the MTs.

467         In *D. melanogaster* and other dipterans, CAPA peptides have been shown to stimulate the nitric  
468 oxide (NO)/cGMP signalling pathway to induce diuresis<sup>98</sup>. When released, CAPA peptides bind to  
469 GPCRs found in principal (type I) cells of MTs, increasing Ca<sup>2+</sup> levels in the cell through activation of L-  
470 type voltage gated calcium channels<sup>100</sup>. The influx of Ca<sup>2+</sup> through these channels activates NOS, causing  
471 the production of NO, which subsequently activates guanylate cyclase to increase levels of cGMP in the  
472 MTs<sup>44</sup>. Ultimately, the activation of the NO/cGMP pathway stimulates the apical V-type H<sup>+</sup>-ATPase  
473 (proton pump), to increase fluid secretion in *D. melanogaster*. In the mosquito *A. aegypti*, CAPA peptides  
474 lead to activation of PKG, via elevated levels of cGMP<sup>36</sup> and exogenous cGMP considerably inhibits fluid  
475 secretion rate<sup>37</sup>. Here, we sought to establish the roles of NO, cGMP and PKG on the anti-diuretic effects  
476 of CAPA peptides on adult mosquito MTs. Inhibitory doses of cGMP and a CAPA neuropeptide, namely  
477 *AedaeCAPA*-1, were treated with a NOS inhibitor, L-NAME, and a PKG inhibitor, KT5823. These  
478 investigations established that L-NAME did not alter the inhibitory effects of exogenous cGMP since this  
479 drug inhibits NOS, which is upstream of cGMP and, as a result, inhibition of DH<sub>31</sub>-stimulated secretion  
480 was unaffected. Contrastingly, *AedaeCAPA*-1 mediated inhibition of DH<sub>31</sub>-stimulated MTs was mitigated  
481 in the presence of L-NAME, reducing the anti-diuretic effects observed with *AedaeCAPA*-1.  
482 Comparatively, these findings are similar but are not identical to the effects of the PKG inhibitor,  
483 KT5823, which abolished the anti-diuretic activity of both *AedaeCAPA*-1 and cGMP, resulting in normal

484 DH<sub>31</sub>-induced diuresis. Similar results were observed in 5-HT-stimulated MTs with one exception;  
485 *Aedae*CAPA-1 inhibition appeared to be independent of NOS since L-NAME had no influence on the  
486 anti-diuretic activity of *Aedae*CAPA-1 in 5-HT-stimulated MTs. Interestingly, the inhibition of both  
487 DH<sub>31</sub>- and 5-HT stimulated diuresis by *Aedae*CAPA-1 and cGMP were sensitive to the PKG inhibitor,  
488 KT5823, which indicates that while some differences in signalling associated with inhibition of different  
489 diuretic hormones may occur, these inhibitory pathways likely converge and involve cGMP activating  
490 protein kinase G. Taken together, the findings in this study provide definitive evidence that CAPA  
491 peptides are anti-diuretic hormones in the mosquito *A. aegypti*, which inhibit fluid secretion of adult  
492 mosquito MTs through a signalling cascade involving the NOS/cGMP/PKG pathway. Further studies are  
493 necessary in mosquitoes as well as other insects to elucidate the differential regulation by DHs and ADHs  
494 given ample data supporting that cGMP and related effectors can be both stimulatory<sup>44,79,99,101</sup> and  
495 inhibitory<sup>31,32,36-37,43,81,102</sup> in their control on insect MTs. In conclusion, we have established an anti-  
496 diuretic hormone system in the adult mosquito *A. aegypti* providing evidence of a neural-renal axis  
497 whereby the neuropeptidergic anti-diuretic hormone is released by the abdominal segmental neurohaemal  
498 organs and subsequently targets their cognate receptor expressed within the principal cells of the MTs to  
499 counteract the activity of a subset of mosquito diuretic hormones. Fine-tuning of stimulatory and  
500 inhibitory hormones controlling the insect excretory system is of utmost importance to ensure overall  
501 organismal homeostasis to combat variable environmental conditions or feeding-related states that could  
502 perturb hydromineral balance if left unregulated.

503

504

505 **Figure captions**

506 **Figure 1.** CAPA neuropeptide (anti-diuretic hormone) receptor (CAPAr) functional deorphanization  
507 using a heterologous assay. (A) Normalized dose-response curve demonstrating specificity of CAPAr  
508 functional activation by CAPA gene-derived neuropeptides. (B) Raw luminescent response following  
509 application of each CAPA gene-derived neuropeptide and representative neuropeptides belonging to  
510 several insect families, each tested at 10 $\mu$ M. For peptide sequence information and species origin, see  
511 Table S3. Only CAPA gene-derived neuropeptides resulted in a significant luminescent response relative  
512 to BSA control (vehicle). At this saturating dose, no difference in response was observed between the  
513 two endogenous CAPA neuropeptides, *Aedae*CAPA1 and *Aedae*CAPA2; *Aedae*PK1, demonstrated a  
514 significantly lower luminescent response (only ~20% activity compared to either CAPA peptide), but  
515 nonetheless this response was significantly higher compared to all other tested peptides that were identical  
516 to background luminescent responses obtained with vehicle control (BSA). Different letters denote bars  
517 that are significantly different from one another as determined by one-way ANOVA and Tukey's multiple  
518 comparison post-hoc test ( $p < 0.01$ ). Data represent the mean  $\pm$  standard error ( $n = 3$ ).

519

520 **Figure 2.** Expression analysis of *CAPAr* transcript in the mosquito, *A. aegypti*. (A) Ontogenic expression  
521 profile of *CAPAr* transcript over post-embryonic stages of the *A. aegypti* mosquito shown relative to  
522 transcript levels in 1<sup>st</sup> instar larvae. (B) Spatial expression is analyzed in various tissues/organs from four-  
523 day old adult females, with transcript abundance shown relative to levels in the male midgut. (C) Cell-  
524 specific expression of *CAPAr* mRNA in principal cells (arrows) of MTs from adult female *A. aegypti*  
525 detected using an anti-sense probe, with no detection in the stellate cells (arrowheads). (D) No signal was  
526 detected in preparations hybridized with control *CAPAr* sense probe. All images acquired using identical  
527 microscope settings; scale bars in C-D are 100 $\mu$ m.

528

529

530 **Figure 3.** Mapping of anti-diuretic hormone in the abdominal ganglia of the central nervous system and  
531 associated neurohaemal organs in adult *A. aegypti*. (A) Immunohistochemical distribution of CAPA  
532 neuropeptides in the abdominal ganglia (AG); specifically, a pair of highly immunoreactive  
533 neurosecretory cells within AG1-2 (A), AG3-4 (A') and AG4-6 (A''). Higher magnification of AG3 (B)  
534 and AG4 (C) demonstrating CAPA immunoreactivity within large ventrally-positioned neurosecretory  
535 cells with axonal projections emanating dorsally within the ganglia and projecting anteriorly into the  
536 median nerve. (D) CAPA immunoreactivity in abdominal preparations with dorsal cuticle removed  
537 leaving the ventrally-localized AG within the abdominal segment showing immunoreactive processes  
538 innervating the abdominal neurohaemal (perivisceral) organs. CAPA transcript localization by fluorescent  
539 *in situ* hybridization revealing pairs of neurons within each AG including AG1 (E), AG2 (E'), AG3 (E'')  
540 and AG4-5 and the sixth terminal abdominal ganglion (TAG; E'''). Co-localization of CAPA  
541 immunoreactivity (F) and CAPA transcript (G) was verified in all abdominal ganglia with representative  
542 preparation in (H) showing transcript and immunoreactivity co-detection and overlap. Scale bars: 200 $\mu$ m  
543 (A & D), 100 $\mu$ m (B-C) and 50 $\mu$ m (E-H).

544

545 **Figure 4.** RNA interference (RNAi) of *CAPAr* abolishes anti-diuretic activity of CAPA neuropeptide on  
546 adult female *A. aegypti* MTs. (A) Verification of significant knockdown (>75%) of *CAPAr* transcript in  
547 MTs of four-day old adult female *A. aegypti* by RNAi achieved through injection of dsCAPAr on day one  
548 post-eclosion. (B) Functional consequences of *CAPAr* knockdown demonstrating loss of anti-diuretic  
549 hormone activity by *AedaeCAPA-1* against *DromeDH<sub>31</sub>*-stimulated fluid secretion by MTs. In (A),  
550 knockdown of *CAPAr* transcript was analyzed by one-tailed t-test (\* denotes significant knockdown,  $p <$   
551 0.01). In (B), fluid secretion rates by MTs presented as mean  $\pm$  SEM and analyzed by one-way ANOVA  
552 and Tukey's multiple comparison post-test, where different letters denote treatments that are significantly  
553 different ( $p < 0.05$ ,  $n = 14-33$ ).

554

555 **Figure 5.** Effect of a nitric oxide synthase (NOS) inhibitor (*L*-NAME) on the anti-diuretic activity of  
556 *AedaeCAPA-1* and cGMP in *DromeDH<sub>31</sub>*-stimulated *A. aegypti* MTs. The NOS inhibitor, *L*-NAME, was  
557 applied against (A) *DromeDH<sub>31</sub>*- and (B) 5HT-stimulated MTs alone or in the presence of either  
558 *AedaeCAPA-1* or cGMP. Secretion rates are presented as mean  $\pm$  SEM,  $n = 17-22$ . Columns that are  
559 significantly different from unstimulated controls are denoted with a distinct letter, as determined by a  
560 one-way ANOVA and Bonferroni post-test ( $p < 0.05$ ).

561

562 **Figure 6.** Effect of a protein kinase G (PKG) inhibitor (KT5823) on the anti-diuretic activity of  
563 *AedaeCAPA-1* and cGMP in *DromeDH<sub>31</sub>*-stimulated *A. aegypti* MTs. The PKG inhibitor, KT5823, was  
564 applied against (A) *DromeDH<sub>31</sub>*- and (B) 5HT-stimulated MTs alone or in the presence of either  
565 *AedaeCAPA-1* or cGMP. Secretion rates are presented as mean  $\pm$  SEM,  $n = 16-25$ . Columns that are  
566 significantly different from unstimulated controls are denoted with a distinct letter, as determined by a  
567 one-way ANOVA and Bonferroni post-test ( $p < 0.05$ ).

568

#### 569 **Supplementary file captions:**

570

571 **Figure S1.** Sequence and gene structure of *A. aegypti* anti-diuretic hormone receptor. (A) The complete  
572 cDNA sequence (lowercase) and deduced protein sequence comprised of 712 amino acid residues  
573 (uppercase) along with predicted transmembrane domains (denoted by black highlighted residues) and  
574 other features as reported in the results text. Predictions of receptor features are described in the methods  
575 section. Nucleotides belonging to different exons are indicated by alternative blue/black font colour.  
576 Predicted polyadenylation signal is underlined in the 3' untranslated region. (B) Exons with relative size  
577 to one another drawn to scale and denotes the open reading frame (in darker gray shading) beginning with  
578 the start codon in the third exon and stop codon within the eleventh exon. Intron sizes are predicted based  
579 on comparison of the deduced completed cDNA sequence with the *A. aegypti* genome scaffolds assessed  
580 on a local database using Geneious bioinformatics software (see methods for details). Predicted intron  
581 sizes range from as small as 415bp (between exons 6-7) and as large as 74,016bp (between exons 1-2)



582 with the entire gene spanning a genomic region of >351kb.

583

584 **Figure S2.** Molecular phylogenetic relationship of insect CAPA receptors inferred using the maximum  
585 likelihood method. Shown is the tree with the highest log likelihood with the numbers adjacent to the  
586 branches denoting the percentage of trees in which the associated taxa clustered together. A heuristic  
587 search was conducted to deduce an initial tree by applying Neighbor-Join and BioNJ algorithms to a  
588 matrix of pairwise distances estimated using a JTT model. Following this initial analysis, the topology  
589 with superior log likelihood value was selected automatically. Branch lengths are drawn to scale and  
590 denote the number of substitutions per site based on the final analysis involving 42 amino acid sequences  
591 and a total of 206 residue positions in the final data set with positions containing gaps and missing data  
592 removed. The human neuromedin U receptor 2 was included in the analysis and designated as the  
593 outgroup.

594

595 **Figure S3.** CAPA immunoreactivity observed in regions of the nervous system aside from the strongly-  
596 staining pair of neurosecretory cells in each of the abdominal ganglia. (A) CAPA immunoreactive  
597 staining in the brain showing a bilateral pair of neurons in each hemisphere of the brain and  
598 immunoreactive processes in the central margin with unknown origin. In the posterior suboesophageal  
599 ganglion, a number of small bilaterally-paired neurons (20-30 cells total) were detected. (B) In the fused  
600 thoracic ganglia, CAPA immunoreactive processes were observed on the ventral surface, with no  
601 consistently detected immunoreactive neurons. Although a qualitative observation, CAPA immunoreactive  
602 staining was substantially weaker in the brain, SOG and thoracic ganglia since exposure and gain settings  
603 on the fluorescence microscope were adjusted substantially to enable detection of weak immunoreactive  
604 staining. Scale bars: 100 $\mu$ m.

605

606 **Figure S4.** Expression analysis of CAPA neuropeptide (anti-diuretic hormone) transcript in different  
607 regions of the nervous system relative to whole adult (A) male and (B) female *A. aegypti* mosquitoes.  
608 Different letters denote bars that are significantly different from one another as determined by one-way  
609 ANOVA and Tukey's multiple comparison post-hoc test ( $p < 0.01$ ). Data represent the mean  $\pm$  standard  
610 error ( $n = 3$ ).

611

612 **Table S1.** Oligonucleotides used for initial amplification and subsequent identification of the complete  
 613 cDNA (including 5' and 3' UTR) encoding the *Aedes aegypti* anti-diuretic hormone (CAPA) receptor.

| Oligo name    | Oligo sequence (5'3')  | Function                                | Accession (nucleotide position) |
|---------------|------------------------|-----------------------------------------|---------------------------------|
| AedesCAPAr F0 | GTGACCATTCTCTTCACGG    | amplification of partial capaR sequence | MN433886 (1326-1344)            |
| AedesCAPAr R0 | CAGCTTGGAGCTCTCGCAGC   | amplification of partial capaR sequence | MN433886 (2327-2308)            |
| AedesCAPAr F1 | CGTCGTGGGCAATTTGATT    | 3'RACE primer#1                         | MN433886 (1361-1379)            |
| AedesCAPAr F2 | TATCCGATTTGATCCTGCTGC  | 3'RACE primer#2                         | MN433886 (1450-1470)            |
| AedesCAPAr F3 | GTTTCTGGCCATCTGTCATCC  | 3'RACE primer#3                         | MN433886 (1616-1636)            |
| AedesCAPAr R1 | GAAAACAGCCACGTATTGACC  | 5'RACE primer#1                         | MN433886 (2128-2108)            |
| AedesCAPAr R2 | TCCGGATAATCGCCTTTTTTCG | 5'RACE primer#2                         | MN433886 (2007-1987)            |
| AedesCAPAr R3 | GATTTGCATTCCCATCCG     | 5'RACE primer#3                         | MN433886 (1913-1896)            |

614

615

616 **Table S2.** List and primary structure of several insect neuropeptides tested for functional activation of the  
 617 mosquito anti-diuretic hormone (CAPA) receptor using heterologous bioassay. NA denotes peptides with  
 618 no detectable activity when tested up to 10 $\mu$ M.

619

| Peptide Family (Name) | Sequence                     | EC <sub>50</sub> on CAPAr | Species (reference)                           |
|-----------------------|------------------------------|---------------------------|-----------------------------------------------|
| CAPA (CAPA1)          | GPTVGLFAFPRV-NH <sub>2</sub> | 6.76nM                    | <i>Aedes aegypti</i><br>(Predel et al., 2010) |
| CAPA (CAPA2)          | pQGLVPFPRV-NH <sub>2</sub>   | 5.62nM                    | <i>Aedes aegypti</i>                          |

|                               |                                  |       |                                                            |
|-------------------------------|----------------------------------|-------|------------------------------------------------------------|
|                               |                                  |       | (Predel et al., 2010)                                      |
| Pyrokinin-1 (PK1)             | AGNSGANSGMWFGPRL-NH <sub>2</sub> | >10μM | <i>Aedes aegypti</i><br>(Predel et al., 2010)              |
| Pyrokinin-2 (PK2-1)           | NTVNFSPRL-NH <sub>2</sub>        | NA    | <i>Rhodnius prolixus</i> (Paluzzi & O'Donnell, 2012)       |
| Pyrokinin-2 (PK2-2)           | SPPFAPRL-NH <sub>2</sub>         | NA    | <i>Rhodnius prolixus</i> (Paluzzi & O'Donnell, 2012)       |
| SIFamide peptide (SIFa)       | GYRKPPFNGSIF-NH <sub>2</sub>     | NA    | <i>Aedes aegypti</i><br>(Predel et al., 2010)              |
| Extended FMRFamides (FMRFa-1) | SALDKNFMRF-NH <sub>2</sub>       | NA    | <i>Aedes aegypti</i><br>(Predel et al., 2010)              |
| Short neuropeptide F (sNPF)   | KAVRSPSLRLRF-NH <sub>2</sub>     | NA    | <i>Aedes aegypti</i><br>(Predel et al., 2010)              |
| Myoinhibitory peptide (MIP-7) | AWNSLHGGW-NH <sub>2</sub>        | NA    | <i>Rhodnius prolixus</i><br>(Paluzzi et al., 2015)         |
| Leucokinin (kinin)            | NSVVLGKKQRFHSWG-NH <sub>2</sub>  | NA    | <i>Drosophila melanogaster</i><br>(Zandawala et al., 2018) |
| Corazonin (CRZ)               | pQTFQYSRGWTN-NH <sub>2</sub>     | NA    | <i>Aedes aegypti</i><br>(Oryan et al., 2018)               |

620 **Table S3.** Oligonucleotides used for generation of fluorescent *in situ* hybridization probes, templates for  
621 *in vitro* dsRNA synthesis and gene-specific primers for quantitative PCR of the *Aedes aegypti* anti-  
622 diuretic hormone (CAPA) receptor.

| Oligo name      | Oligo sequence (5'3')                                | Function                  | Accession (nucleotide position) |
|-----------------|------------------------------------------------------|---------------------------|---------------------------------|
| AedesCAPAF fish | GACCTGGACAGCGTCAGC                                   | FISH probe template       | XM_001650839.1 □ (28-45)        |
| AedesCAPAR fish | CAGTTCCTTTGATCTCGGTG                                 | FISH probe template       | XM_001650839.1 □ (400-381)      |
| AedesCAPA F1-T7 | TAATACGACTCACTATAGG<br>GCGA...<br>GACCTGGACAGCGTCAGC | FISH sense probe template | XM_001650839.1 □ (28-45)        |

|                    |                                                                    |                                                   |                               |
|--------------------|--------------------------------------------------------------------|---------------------------------------------------|-------------------------------|
| AedesCAPA R1-T7    | <u>TAATACGACTCACTATAGG</u><br>GCGA...<br>CAGTTCCTTTGATCTCGGTG      | FISH anti-sense<br>probe template                 | XM_001650839.1 □<br>(400-381) |
| AedesCAPA-qPCRfor  | <u>GCTGTTTGCCTTTCCAAG</u>                                          | qPCR forward<br>primer                            | XM_001650839.1 □(78-<br>95)   |
| AedesCAPA-qPCRrev  | <u>AACCACATGCCGCTGTTG</u>                                          | qPCR reverse<br>primer                            | XM_001650839.1 □<br>(344-327) |
| AedesCAPArRNAiF1   | CCCACGGAAATCATGGACT                                                | FISH probe and<br>dsRNA template                  | MN433886<br>(275-293)         |
| AedesCAPArRNAiR1   | GCGGATTTGCATTCCCATC                                                | FISH probe and<br>dsRNA template                  | MN433886<br>(1017-999)        |
| AedesCAPArRNAiF-T7 | <u>TTTAATACGACTCACTATA</u><br><u>GGGAGACCCACGGAAATC</u><br>ATGGACT | FISH sense<br>probe<br>and dsRNA<br>template      | MN433886<br>(275-293)         |
| AedesCAPArRNAiR-T7 | <u>TTTAATACGACTCACTATA</u><br><u>GGGAGAGCGGATTTGCATT</u><br>CCCATC | FISH anti-sense<br>probe<br>and dsRNA<br>template | MN433886<br>(1017-999)        |
| AedesCAPAr-qPCRfor | GATGCTTAGCAATCCGGAA                                                | qPCR forward<br>primer                            | MN433886<br>(909-927)         |
| AedesCAPAr-qPCRrev | GACGGAAAACAGCCACGT<br>A                                            | qPCR reverse<br>primer                            | MN433886<br>(1239-1221)       |

623

624

625 **References**

- 626 1. Schoofs, L., De Loof, A. & Van Hiel, M. B. Neuropeptides as regulators of behavior in insects.  
627 *Annu. Rev. Entomol.* **62**, 35–52 (2017).
- 628 2. He, Q., Wu, B., Price, J. & Zhao, Z. Circadian rhythm neuropeptides in *Drosophila*: Signals for  
629 normal circadian function and circadian neurodegenerative disease. *Int. J. Mol. Sci.* **18**, 886  
630 (2017).
- 631 3. Terhzaz, S. *et al.* Insect capa neuropeptides impact desiccation and cold tolerance. *Proc. Natl.*  
632 *Acad. Sci. U. S. A.* **112**, 2882–2887 (2015).
- 633 4. Coast, G. M., Orchard, I., Phillips, J. E. & Schooley, D. A. Insect diuretic and antidiuretic  
634 hormones. *Adv. In Insect Phys.* **29**, 279–409 (2002).
- 635 5. Hillyer, J. F. Insect heart rhythmicity is modulated by evolutionarily conserved neuropeptides and  
636 neurotransmitters. *Curr. Opin. Insect Sci.* **29**, 41–48 (2018).
- 637 6. Gäde, G. Regulation of intermediary metabolism and water balance of insects by neuropeptides.  
638 *Annu. Rev. Entomol.* **49**, 93–113 (2004).
- 639 7. Nässel, D. R. & Winther, Å. M. E. *Drosophila* neuropeptides in regulation of physiology and  
640 behavior. *Prog. Neurobiol.* **92**, 42–104 (2010).
- 641 8. Raikhel, A. S. S., Brown, M. R. R. & Belles, X. Hormonal control of reproductive processes. in  
642 *Comp. Mol. Insect Sci.* **3**, 433–491 (2005).
- 643 9. Van Wielendaele, P., Badisco, L. & Vanden Broeck, J. Neuropeptidergic regulation of  
644 reproduction in insects. *Gen. Comp. Endocrinol.* **188**, 23–34 (2013).
- 645 10. Rafaeli, A. Pheromone biosynthesis activating neuropeptide (PBAN): Regulatory role and mode of  
646 action. *Gen. Comp. Endocrinol.* **162**, 69–78 (2009).

- 647 11. Phillips, J. E. *et al.* Some major transport mechanisms of insect absorptive epithelia. *Comp*  
648 *Biochem Physiol A Comp Physiol* **90**, 643–650 (1988).
- 649 12. Phillips, J., Hanrahan, J., Chamberlin, M. & Thomson, B. Mechanisms and control of reabsorption  
650 in insect hindgut. *Adv. In Insect Phys.* **19**, 330–422 (1986).
- 651 13. Cantera, R. & Nässel, D. R. Dual peptidergic innervation of the blowfly hindgut: a light- and  
652 electron microscopic study of FMRamide and proctolin immunoreactive fibers. *Comp. Biochem.*  
653 *Physiol. C.* **99**, 517–25 (1991).
- 654 14. Steele, R. W., Lange, A. B., Orchard, I. & Starratt, A. N. Comparison of the myotropic activity of  
655 position-2 modified analogues of proctolin on the hindgut of *Periplaneta americana* and the  
656 oviduct of *Locusta migratoria*. *J Insect Physiol* **43**, 931–938 (1997).
- 657 15. Coast, G. The endocrine control of salt balance in insects. *Gen Comp Endocrinol* **152**, 332–338  
658 (2007).
- 659 16. O'Donnell, M. & Spring, J. Modes of control of insect Malpighian tubules: synergism,  
660 antagonism, cooperation and autonomous regulation. *J. Insect Physiol.* **46**, 107–117 (2000).
- 661 17. Baldwin, D. C., Schegg, K. M., Furuya, K., Lehmberg, E. & Schooley, D. A. Isolation and  
662 identification of a diuretic hormone from *Zootermopsis nevadensis*. *Peptides* **22**, 147–152 (2001).
- 663 18. Lehmberg, E. *et al.* Identification of a diuretic hormone of *Locusta migratoria*. *Biochem Biophys*  
664 *Res Commun* **179**, 1036–1041 (1991).
- 665 19. Furuya, K. *et al.* Cockroach diuretic hormones: characterization of a calcitonin-like peptide in  
666 insects. *Proc Natl Acad Sci U S A* **97**, 6469–6474 (2000).
- 667 20. Te Brugge, V., Paluzzi, J. P., Schooley, D. A. & Orchard, I. Identification of the elusive  
668 peptidergic diuretic hormone in the blood-feeding bug *Rhodnius prolixus*: a CRF-related peptide.

- 669 *J. Exp. Biol.* **214**, 371–381 (2011).
- 670 21. Donini, A., O'Donnell, M. J. & Orchard, I. Differential actions of diuretic factors on the  
671 Malpighian tubules of *Rhodnius prolixus*. *J. Exp. Biol.* **211**, 42–48 (2008).
- 672 22. Coast, G. M., Garside, C., Webster, S. G., Schegg, K. M. & Schooley, D. A. Mosquito natriuretic  
673 peptide identified as a calcitonin-like diuretic hormone in *Anopheles gambiae* (Giles). *J. Exp. Biol.*  
674 **208**, 3281–3291 (2005).
- 675 23. Maddrell, S. H., Herman, W. S., Mooney, R. L. & Overton, J. A. 5-Hydroxytryptamine: a second  
676 diuretic hormone in *Rhodnius prolixus*. *J Exp Biol* **156**, 557–566 (1991).
- 677 24. Davies, S.-A. *et al.* Signaling by *Drosophila* capa neuropeptides. *Gen. Comp. Endocrinol.* **188**,  
678 60–6 (2013).
- 679 25. Cabrero, P. *et al.* The Dh gene of *Drosophila melanogaster* encodes a diuretic peptide that acts  
680 through cyclic AMP. *J. Exp. Biol.* **205**, 3799–3807 (2002).
- 681 26. Audsley, N. & Phillips, J. E. Stimulants of ileal salt transport in neuroendocrine system of the  
682 desert locust. *Gen. Comp. Endocrinol.* **80**, 127–137 (1990).
- 683 27. Audsley, N., McIntosh, C. & Phillips, J. E. Actions of ion-transport peptide from locust corpus  
684 cardiacum on several hindgut transport processes. *J. Exp. Biol.* **173**, 275–288 (1992).
- 685 28. Audsley, N., Meredith, J. & Phillips, J. E. Haemolymph levels of *Schistocerca gregaria* ion  
686 transport peptide and ion transport-like peptide. *Physiol. Entomol.* **31**, 154–163 (2006).
- 687 29. Audsley, N., Jensen, D. & Schooley, D. A. Signal transduction for *Schistocerca gregaria* ion  
688 transport peptide is mediated via both cyclic AMP and cyclic GMP. *Peptides* **41**, 74–80 (2013).
- 689 30. Paluzzi, J.-P., Vanderveken, M. & O'Donnell, M. J. The heterodimeric glycoprotein hormone,  
690 GPA2/GPB5, regulates ion transport across the hindgut of the adult mosquito, *Aedes aegypti*.

- 691 *PLoS One* **9**, e86386 (2014).
- 692 31. Paluzzi, J.-P. Distribution, activity and evidence for the release of an anti-diuretic peptide in the  
693 kissing bug *Rhodnius prolixus*. *J. Exp. Biol.* **209**, 907–915 (2006).
- 694 32. Massaro, R. C. *et al.* The mechanism of action of the antidiuretic peptide Tenmo ADFa in  
695 Malpighian tubules of *Aedes aegypti*. *J. Exp. Biol.* **207**, 2877–2888 (2004).
- 696 33. Laenen, B., De Decker, N., Steels, P., Van Kerkhove, E. & Nicolson, S. An antidiuretic factor in  
697 the forest ant: purification and physiological effects on the Malpighian tubules. *J Insect Physiol*  
698 **47**, 185–193 (2001).
- 699 34. Lavigne, C., Embleton, J., Audy, P., King, R. R. & Pelletier, Y. Partial purification of a novel  
700 insect antidiuretic factor from the Colorado potato beetle, *Leptinotarsa decemlineata* (Say)  
701 (Coleoptera: Chrysomelidae), which acts on Malpighian tubules. *Insect Biochem. Mol. Biol.* **31**,  
702 339–347 (2001).
- 703 35. Eigenheer, R. A., Nicolson, S. W., Schegg, K. M., Hull, J. J. & Schooley, D. A. Identification of a  
704 potent antidiuretic factor acting on beetle Malpighian tubules. *Proc Natl Acad Sci U S A* **99**, 84–89  
705 (2002).
- 706 36. Ionescu, A. & Donini, A. AedesCAPA-PVK-1 displays diuretic and dose dependent antidiuretic  
707 potential in the larval mosquito *Aedes aegypti* (Liverpool). *J. Insect Physiol.* **58**, 1299–1306  
708 (2012).
- 709 37. Sajadi, F., Curcuruto, C., Al Dhaheri, A. & Paluzzi, J.-P. Anti-diuretic action of a CAPA  
710 neuropeptide against a subset of diuretic hormones in the disease vector, *Aedes aegypti*. *J. Exp.*  
711 *Biol.* **221**, (2018).
- 712 38. Quinlan, M. C., Tublitz, N. J. & O'Donnell, M. J. Anti-diuresis in the blood-feeding insect



- 713 *Rhodnius prolixus* Stal: the peptide CAP2b and cyclic GMP inhibit Malpighian tubule fluid  
714 secretion. *J Exp Biol* **200**, 2363–2367 (1997).
- 715 39. Coast, G. M., Nachman, R. J. & Lopez, J. The control of Malpighian tubule secretion in a  
716 predacious hemipteran insect, the spined soldier bug *Podisus maculiventris* (Heteroptera,  
717 Pentatomidae). *Peptides* **32**, 493–499 (2011).
- 718 40. Rodan, A. R., Baum, M. & Huang, C.-L. The *Drosophila* NKCC Ncc69 is required for normal  
719 renal tubule function. *Am. J. Physiol. Physiol.* **303**, C883–C894 (2012).
- 720 41. Coast, G. M. *et al.* Neurohormones implicated in the control of Malpighian tubule secretion in  
721 plant sucking heteropterans: The stink bugs *Acrosternum hilare* and *Nezara viridula*. *Peptides* **31**,  
722 468–473 (2010).
- 723 42. Wiehart, U. I. M., Nicolson, S. W., Eigenheer, R. A. & Schooley, D. A. Antagonistic control of  
724 fluid secretion by the Malpighian tubules of *Tenebrio molitor*: effects of diuretic and antidiuretic  
725 peptides and their second messengers. *J. Exp. Biol.* **205**, 493–501 (2002).
- 726 43. Quinlan, M. C. & O'Donnell, M. J. Anti-diuresis in the blood-feeding insect *Rhodnius prolixus*  
727 Stål: antagonistic actions of cAMP and cGMP and the role of organic acid transport. *J. Insect*  
728 *Physiol.* **44**, 561–568 (1998).
- 729 44. Terhzaz, S. *et al.* Mechanism and function of *Drosophila* capa GPCR: a desiccation stress-  
730 responsive receptor with functional homology to human neuromedinU receptor. *PLoS One* **7**,  
731 e29897 (2012).
- 732 45. Jurenka, R. The PRXamide Neuropeptide Signalling System. Conserved in Animals. *Adv. In*  
733 *Insect Phys.* **49**, 123–170 (2015).
- 734 46. Gabilondo, H. *et al.* A targeted genetic screen identifies crucial players in the specification of the

- 735 *Drosophila* abdominal CAPAergic neurons. *Mech. Dev.* **128**, 208–221 (2011).
- 736 47. Gabilondo, H. *et al.* Segmentally homologous neurons acquire two different terminal  
737 neuropeptidergic fates in the *Drosophila* nervous system. *PLoS One* **13**, e0194281 (2018).
- 738 48. Santos, J. G., Pollák, E., Rexer, K.-H., Molnár, L. & Wegener, C. Morphology and metamorphosis  
739 of the peptidergic Va neurons and the median nerve system of the fruit fly, *Drosophila*  
740 *melanogaster*. *Cell Tissue Res.* **326**, 187–199 (2006).
- 741 49. Suska, A., Miguel-Aliaga, I. & Thor, S. Segment-specific generation of *Drosophila* Capability  
742 neuropeptide neurons by multi-faceted Hox cues. *Dev. Biol.* **353**, 72–80 (2011).
- 743 50. Predel, R. *et al.* Neuropeptidomics of the mosquito *Aedes aegypti*. *J Proteome Res* **9**, 2006–2015  
744 (2010).
- 745 51. Predel, R. & Wegener, C. Biology of the CAPA peptides in insects. *Cell. Mol. Life Sci.* **63**, 2477–  
746 2490 (2006).
- 747 52. Eckert, M., Herbert, Z., Pollak, E., Molnar, L. & Predel, R. Identical cellular distribution of all  
748 abundant neuropeptides in the major abdominal neurohemal system of an insect (*Periplaneta*  
749 *americana*). *J Comp Neurol* **452**, 264–275 (2002).
- 750 53. Pollak, E., Eckert, M., Molnar, L. & Predel, R. Differential sorting and packaging of capa-gene  
751 related products in an insect. *J Comp Neurol* **481**, 84–95 (2005).
- 752 54. Wegener, C., Linde, D. & Eckert, M. Periviscerokinins in cockroaches: release, localization, and  
753 taxon-specific action on the hyperneural muscle. *Gen Comp Endocrinol* **121**, 1–12 (2001).
- 754 55. Tublitz, N. J. & Truman, J. W. Identification of neurones containing cardioacceleratory peptides  
755 (CAPs) in the ventral nerve cord of the tobacco hawkmoth, *Manduca sexta*. *J Exp Biol* **116**, 395–  
756 410 (1985).

- 757 56. Rocco, D. A., Kim, D. H. & Paluzzi, J.-P. Immunohistochemical mapping and transcript  
758 expression of the GPA2 / GPB5 receptor in tissues of the adult mosquito , *Aedes aegypti*. *Cell*  
759 *Tissue Res.* **369**, 313–330 (2017).
- 760 57. Olsen, S. S., Cazzamali, G., Williamson, M., Grimmelikhuijzen, C. J. P. & Hauser, F.  
761 Identification of one capa and two pyrokinin receptors from the malaria mosquito *Anopheles*  
762 *gambiae*. *Biochem. Biophys. Res. Commun.* **362**, 245–51 (2007).
- 763 58. Wahedi, A. & Paluzzi, J.-P. Molecular identification, transcript expression, and functional  
764 deorphanization of the adipokinetic hormone/corazonin-related peptide receptor in the disease  
765 vector, *Aedes aegypti*. *Sci. Rep.* **8**, 2146 (2018).
- 766 59. Gondalia, K., Qudrat, A., Bruno, B., Fleites Medina, J. & Paluzzi, J. P. Identification and  
767 functional characterization of a pyrokinin neuropeptide receptor in the Lyme disease vector,  
768 *Ixodes scapularis*. *Peptides* **86**, 42–54 (2016).
- 769 60. Oryan, A., Wahedi, A. & Paluzzi, J.-P. V. Functional characterization and quantitative expression  
770 analysis of two GnRH-related peptide receptors in the mosquito, *Aedes aegypti*. *Biochem. Biophys.*  
771 *Res. Commun.* **497**, 550–557 (2018).
- 772 61. Paluzzi, J.-P. *et al.* Investigation of the potential involvement of eicosanoid metabolites in anti-  
773 diuretic hormone signaling in *Rhodnius prolixus*. *Peptides* **34**, 127–134 (2012).
- 774 62. Paluzzi, J. P., Russell, W. K., Nachman, R. J. & Orchard, I. Isolation, cloning, and expression  
775 mapping of a gene encoding an antidiuretic hormone and other CAPA-related peptides in the  
776 disease vector, *Rhodnius prolixus*. *Endocrinology* **149**, 4638–4646 (2008).
- 777 63. Paluzzi, J.-P. & Orchard, I. A second gene encodes the anti-diuretic hormone in the insect,  
778 *Rhodnius prolixus*. *Mol Cell Endocrinol* **317**, 53–63 (2010).

- 779 64. Durant, A. C., Chasiotis, H., Misyura, L. & Donini, A. *Aedes aegypti* Rhesus glycoproteins  
780 contribute to ammonia excretion by larval anal papillae. *J. Exp. Biol.* **220**, 588–596 (2017).
- 781 65. Ramsay, J. A. Active transport of water by the Malpighian tubules of the stick insect, *Dixippus*  
782 *morosus* (Orthoptera, Phasmidae). *J. Exp. Biol.* **31**, 104–113 (1954).
- 783 66. Petzel, D. H., Berg, M. M. & Beyenbach, K. W. Hormone-controlled cAMP-mediated fluid  
784 secretion in yellow-fever mosquito. *Am. J. Physiol.* **253**, R701–R711 (1987).
- 785 67. Clark, T. M. & Bradley, T. J. Additive effects of 5-HT and diuretic peptide on *Aedes malpighian*  
786 tubule fluid secretion. *Comp. Biochem. Physiol. - A Mol. Integr. Physiol.* **119**, 599–605 (1998).
- 787 68. Veenstra, J. A. Effects of 5-hydroxytryptamine on the Malpighian tubules of *Aedes aegypti*. *J.*  
788 *Insect Physiol* **34**(4), 299-304 (1988).
- 789 69. Schiöth, H. B. & Fredriksson, R. The GRAFS classification system of G-protein coupled receptors  
790 in comparative perspective. *Gen. Comp. Endocrinol.* **142**, 94–101 (2005).
- 791 70. Fredriksson, R., Lagerström, M. C., Lundin, L.-G. & Schiöth, H. B. The G-protein-coupled  
792 receptors in the human genome form five main families. Phylogenetic analysis, paralogon groups,  
793 and fingerprints. *Mol. Pharmacol.* **63**, 1256–1272 (2003).
- 794 71. Rizzo, M. J., Evans, J. P., Burt, M., Saunders, C. J. & Johnson, E. C. Unexpected role of a  
795 conserved domain in the first extracellular loop in G protein-coupled receptor trafficking.  
796 *Biochem. Biophys. Res. Commun.* **503**, 1919–1926 (2018).
- 797 72. Raabe, M. Synthesis and release sites of neurohormones. in *Recent Developments in Insect*  
798 *Neurohormones* 1–68 (Springer US, 1989). doi:10.1007/978-1-4613-0805-8\_1
- 799 73. Raabe, M., Cazal, M., Chalaye, D. & de Bessé, N. Action cardioaccélétratrice des organes  
800 neurohémaux périssymphatiques ventraux des quelques insectes. *Comptes rendus Hebd. des*

- 801            *seances l'Academie des Sci. Ser. D Sci. Nat.* **263**, 2002–2005 (1966).
- 802    74.    Beyenbach, K. W. Transport mechanisms of diuresis in Malpighian tubules of insects. *J. Exp. Biol.*  
803            **206**, 3845–3856 (2003).
- 804    75.    Coast, G. M. Neuroendocrine control of ionic homeostasis in blood-sucking insects. *J. Exp. Biol.*  
805            **212**, 378–386 (2009).
- 806    76.    Phillips, J. Comparative physiology of insect renal function. *Am. J. Physiol.* **241**, R241-57 (1981).
- 807    77.    Eigenheer, R. A. *et al.* Isolation, identification and localization of a second beetle antidiuretic  
808            peptide. *Peptides* **24**, 27–34 (2003).
- 809    78.    Paluzzi, J. P. V, Naikhwah, W. & O'Donnell, M. J. Natriuresis and diuretic hormone synergism  
810            in *R. prolixus* upper Malpighian tubules is inhibited by the anti-diuretic hormone, RhoprCAPA- $\alpha$ 2.  
811            *J. Insect Physiol.* **58**, 534–542 (2012).
- 812    79.    Davies, S. A. *et al.* Neuropeptide stimulation of the nitric oxide signaling pathway in *Drosophila*  
813            *melanogaster* Malpighian tubules. *Am J Physiol* **273**, R823-7 (1997).
- 814    80.    Kean, L. *et al.* Two nitridergic peptides are encoded by the gene *capability* in *Drosophila*  
815            *melanogaster*. *Am. J. Physiol. Regul. Integr. Comp. Physiol.* **282**, R1297-307 (2002).
- 816    81.    MacMillan, H. A. *et al.* Anti-diuretic activity of a CAPA neuropeptide can compromise  
817            *Drosophila* chill tolerance. *J. Exp. Biol.* (2018). doi:10.1242/jeb.185884
- 818    82.    Iversen, A., Cazzamali, G., Williamson, M., Hauser, F. & Grimmelikhuijzen, C. J. Molecular  
819            cloning and functional expression of a *Drosophila* receptor for the neuropeptides capa-1 and -2.  
820            *Biochem Biophys Res Commun* **299**, 628–633 (2002).
- 821    83.    Park, Y., Kim, Y.-J. & Adams, M. E. Identification of G protein-coupled receptors for *Drosophila*  
822            PRXamide peptides, CCAP, corazonin, and AKH supports a theory of ligand-receptor

- 823 coevolution. *Proc Natl Acad Sci U S A* **99**, 11423–11428 (2002).
- 824 84. Shen, Z. *et al.* BNGR-A25L and -A27 are two functional G protein–coupled receptors for CAPA  
825 periviscerokinin neuropeptides in the silkworm *Bombyx mori*. *J. Biol. Chem.* **292**, 16554–16570  
826 (2017).
- 827 85. Jiang, H., Wei, Z., Nachman, R. J., Adams, M. E. & Park, Y. Functional phylogenetics reveals  
828 contributions of pleiotropic peptide action to ligand–receptor coevolution. *Sci. Rep.* **4**, 6800 (2014).
- 829 86. Paluzzi, J. P., Park, Y., Nachman, R. J. & Orchard, I. Isolation, expression analysis, and functional  
830 characterization of the first antidiuretic hormone receptor in insects. *Proc. Natl. Acad. Sci. U. S. A.*  
831 **107**, (2010).
- 832 87. Yang, Y., Bajracharya, P., Castillo, P., Nachman, R. J. & Pietrantonio, P. V. Molecular and  
833 functional characterization of the first tick CAP2b (periviscerokinin) receptor from *Rhipicephalus*  
834 (*Boophilus*) *microplus* (Acari: Ixodidae). *Gen. Comp. Endocrinol.* **194**, (2013).
- 835 88. Veenstra, J. A. The contribution of the genomes of a termite and a locust to our understanding of  
836 insect neuropeptides and neurohormones. *Front. Physiol.* **5**, 454 (2014).
- 837 89. Predel, R. *et al.* Peptidomics of CNS-associated neurohemal systems of adult *Drosophila*  
838 *melanogaster*: a mass spectrometric survey of peptides from individual flies. *J Comp Neurol* **474**,  
839 379–392 (2004).
- 840 90. Wegener, C., Reinl, T., Jänsch, L. & Predel, R. Direct mass spectrometric peptide profiling and  
841 fragmentation of larval peptide hormone release sites in *Drosophila melanogaster* reveals tagma-  
842 specific peptide expression and differential processing. *J. Neurochem.* **96**, 1362–1374 (2006).
- 843 91. Wormington, J. D. & Juliano, S. A. Sexually dimorphic body size and development time plasticity  
844 in *Aedes* mosquitoes (Diptera: Culicidae). *Evol. Ecol. Res.* **16**, 223–234 (2014).

- 845 92. Graveley, B. R. *et al.* The developmental transcriptome of *Drosophila melanogaster*. *Nature* **471**,  
846 473–479 (2011).
- 847 93. O'Donnell, M. J., Dow, J. A., Huesmann, G. R., Tublitz, N. J. & Maddrell, S. H. Separate control  
848 of anion and cation transport in Malpighian tubules of *Drosophila melanogaster*. *J. Exp. Biol.* **199**,  
849 1163–1175 (1996).
- 850 94. Chintapalli, V. R., Wang, J. & Dow, J. A. Using FlyAtlas to identify better *Drosophila*  
851 *melanogaster* models of human disease. *Nat. Genet.* **39**, 715–720 (2007).
- 852 96. Kean, L. *et al.* Two nitridergic peptides are encoded by the gene *capa* in *Drosophila*  
853 *melanogaster*. *Am. J. Physiol. Integr. Comp. Physiol.* **282**, R1297–R1307 (2002).
- 854 97. Halberg, K. A., Terhzaz, S., Cabrero, P., Davies, S. A. & Dow, J. A. T. Tracing the evolutionary  
855 origins of insect renal function. *Nat. Commun.* **6**, 6800 (2015).
- 856 98. Pollock, V. P. *et al.* Conservation of *capa* peptide-induced nitric oxide signalling in Diptera. *J.*  
857 *Exp. Biol.* **207**, 4135–4145 (2004).
- 858 99. Davies, S.-A. *et al.* Signaling by *Drosophila capa* neuropeptides. *Gen. Comp. Endocrinol.* **188**,  
859 60–66 (2013).
- 860 100. MacPherson, M. R. *et al.* L-type calcium channels regulate epithelial fluid transport in *Drosophila*  
861 *melanogaster*. *Am. J. Physiol. Physiol.* **280**, C394–C407 (2001).
- 862 101. Davies, S. A. *et al.* CAP2b, a cardioacceleratory peptide, is present in *Drosophila* and stimulates  
863 tubule fluid secretion via cGMP. *Am J Physiol* **269**, R1321-6 (1995).
- 864 102. Ruka, K. A., Miller, A. P. & Blumenthal, E. M. Inhibition of diuretic stimulation of an insect  
865 secretory epithelium by a cGMP-dependent protein kinase. *Am J Physiol Ren. Physiol* **304**, F1210-  
866 6 (2013).

867

868



**A**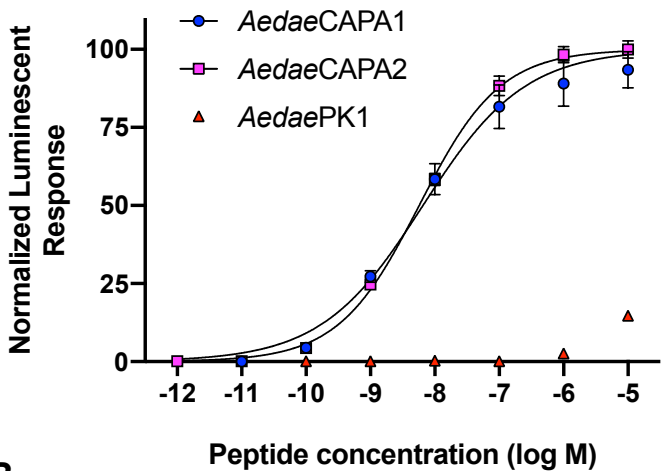**B**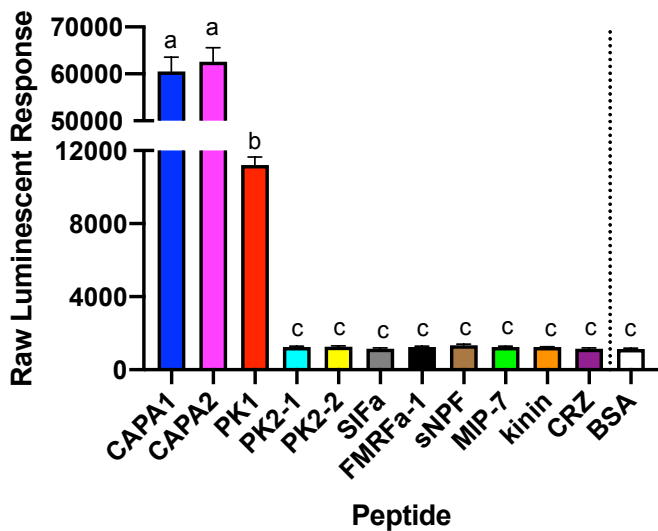

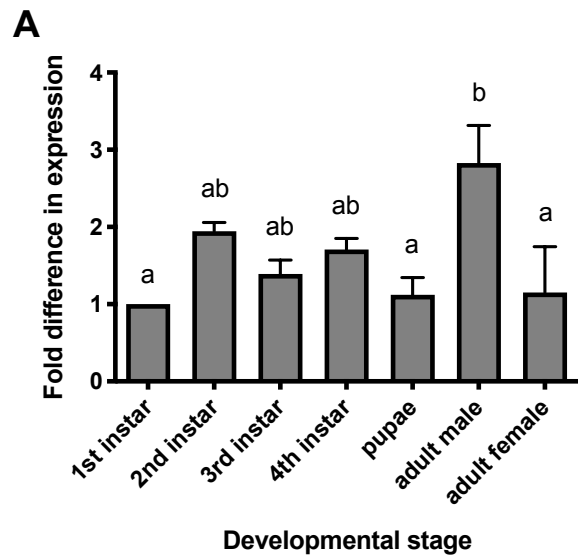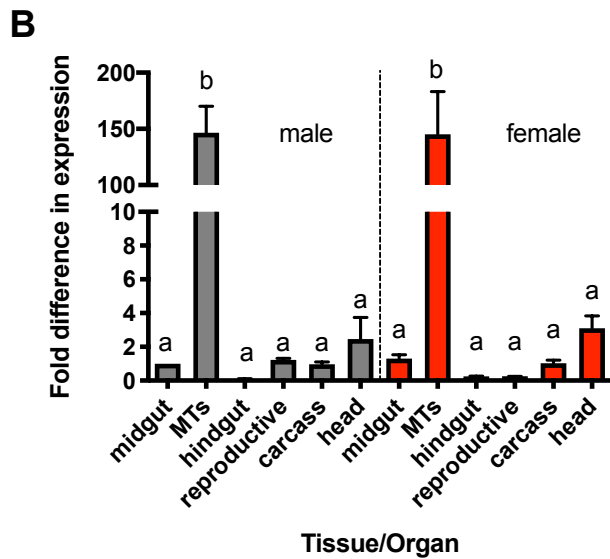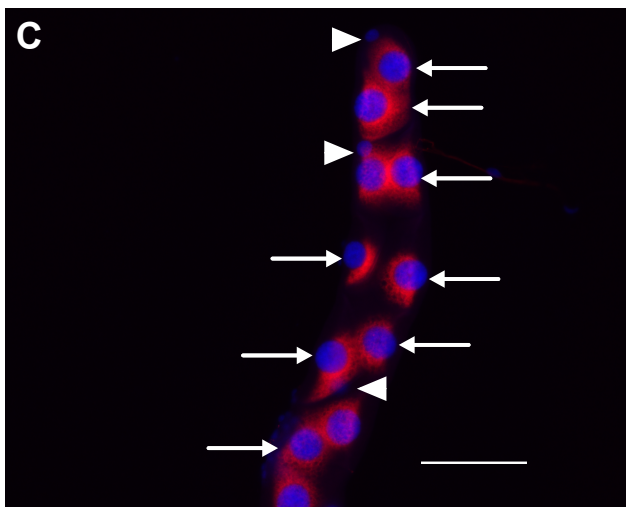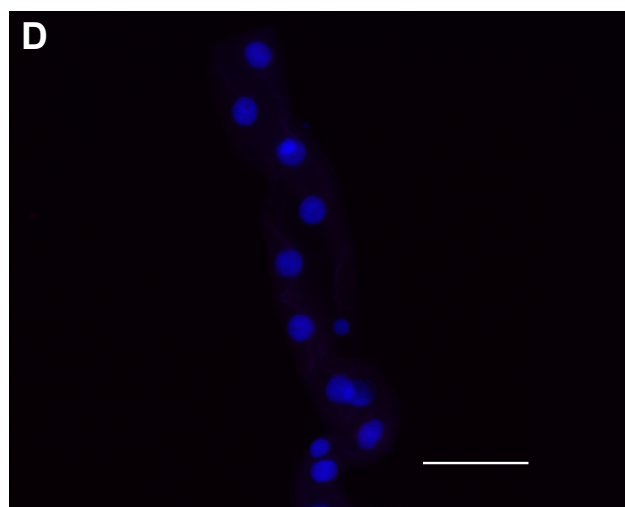

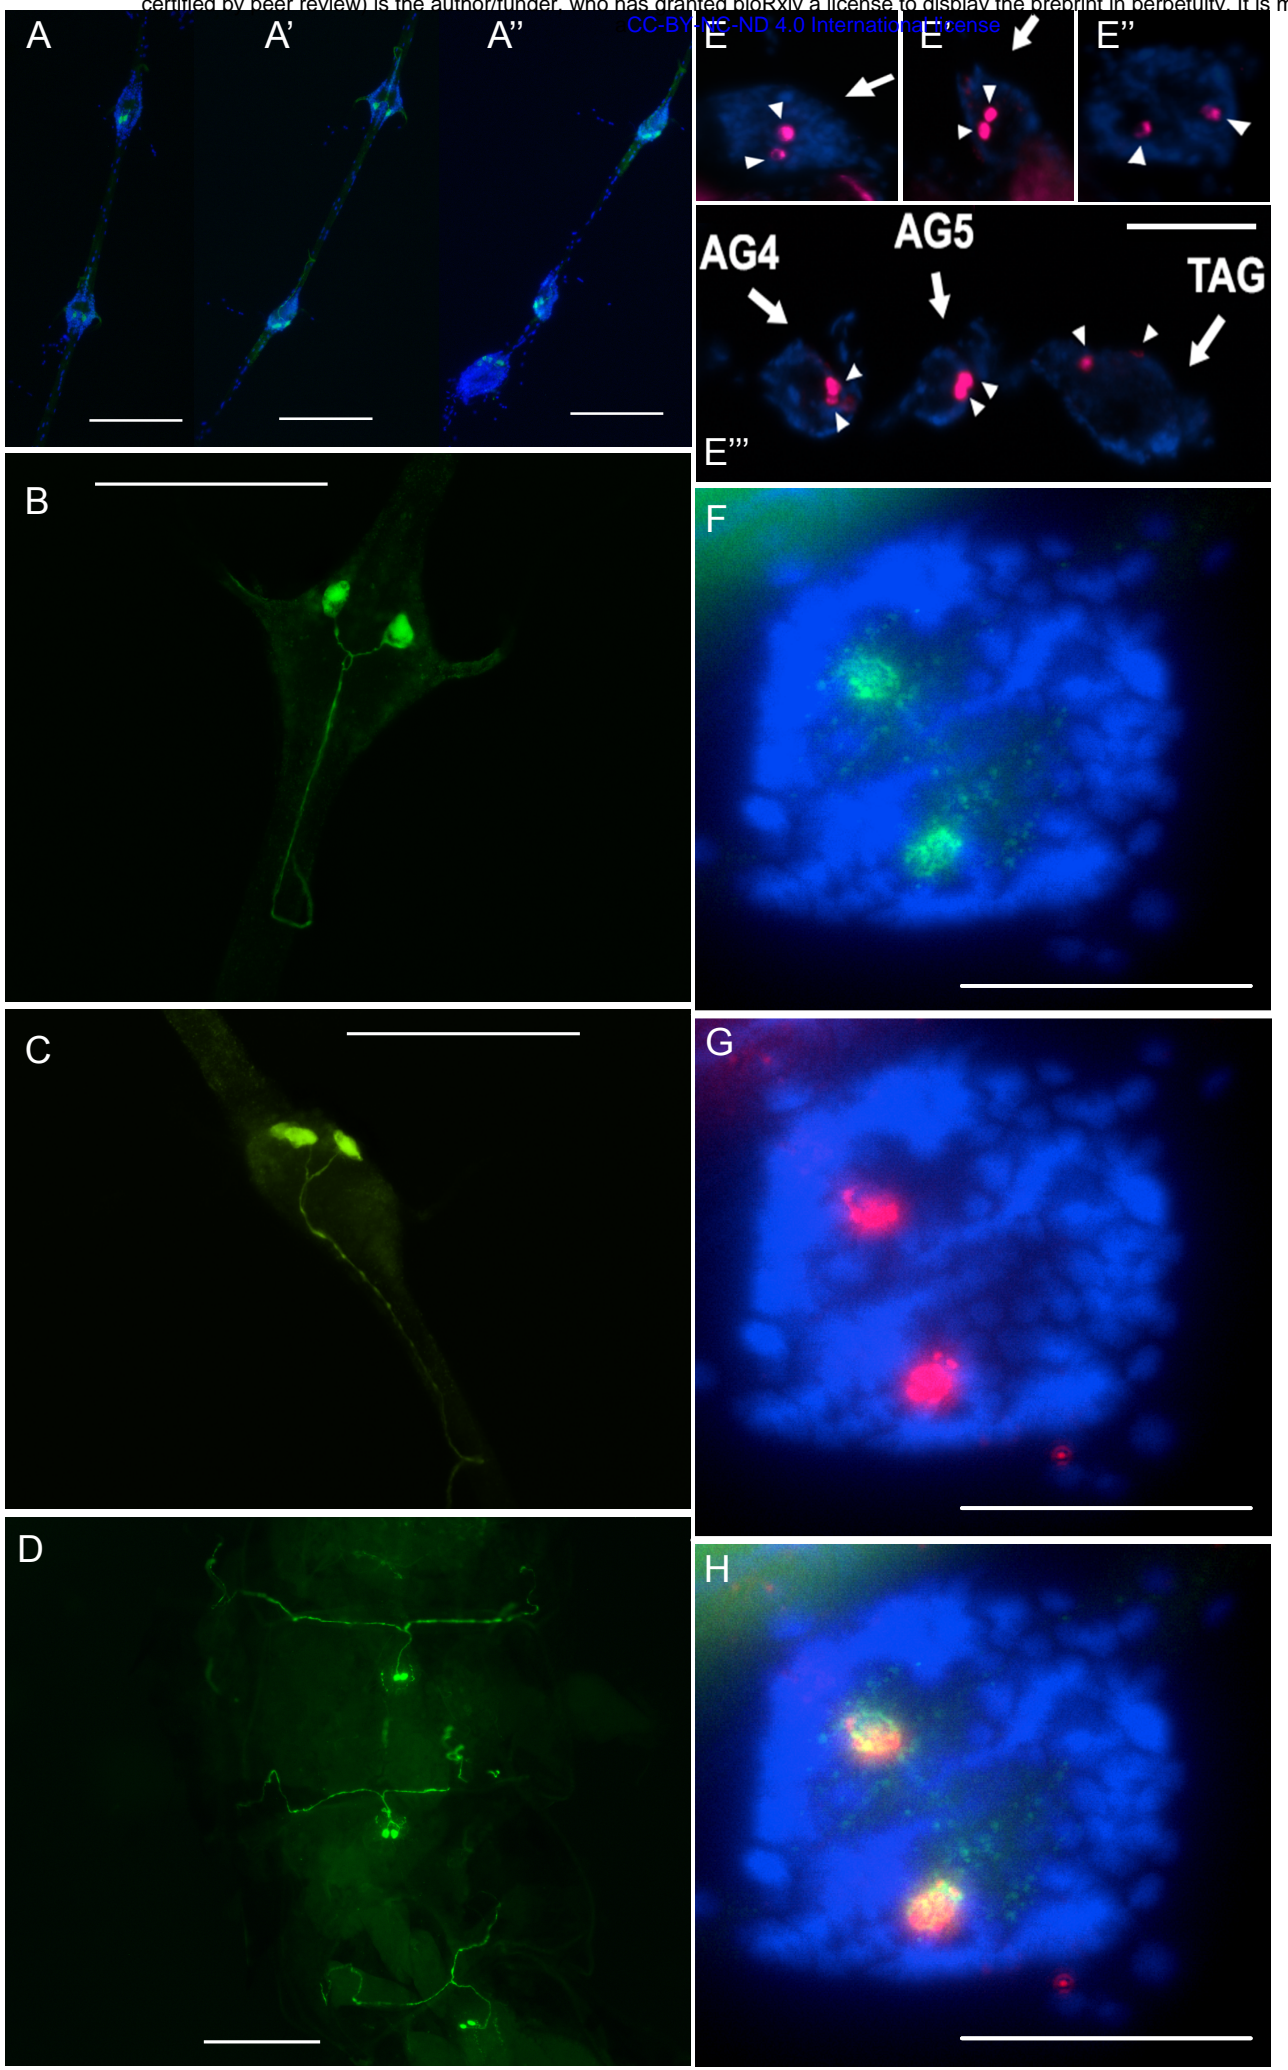

**A**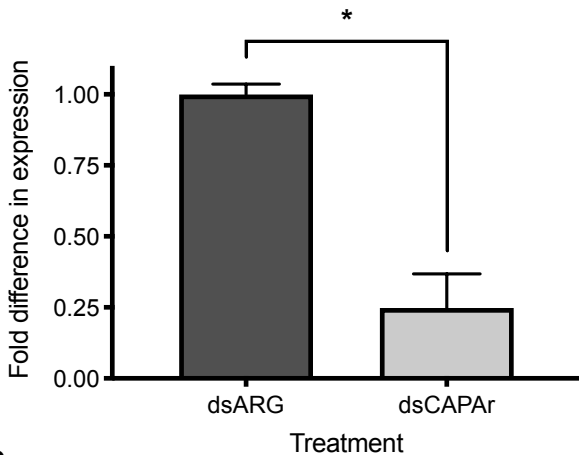**B**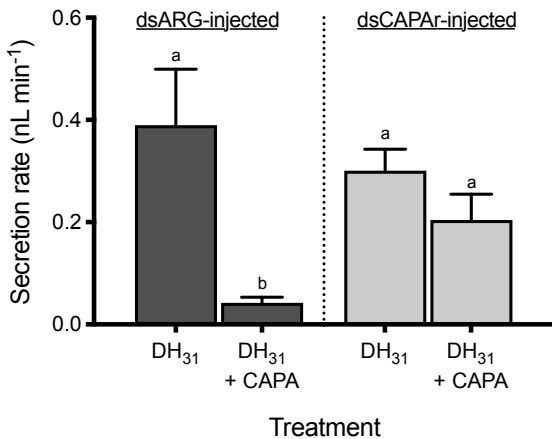

**A**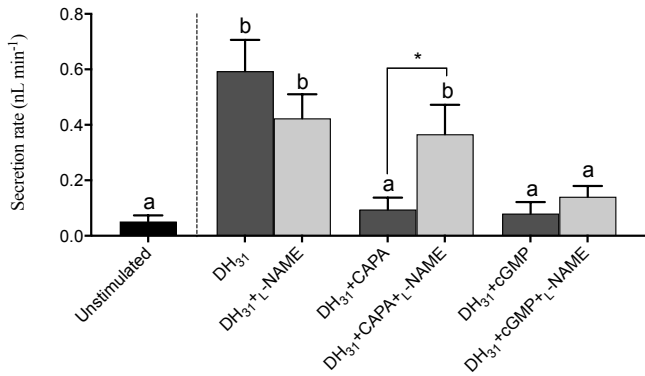**B**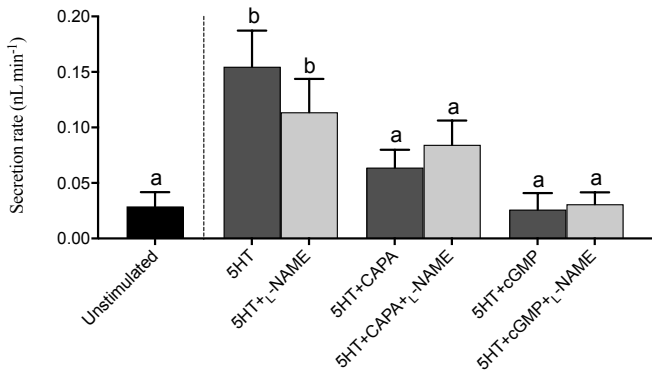

**A**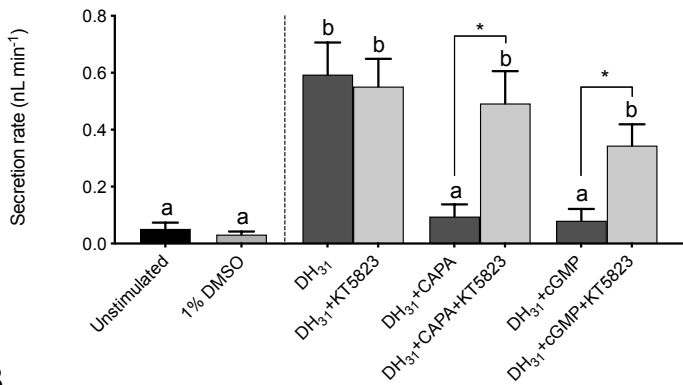**B**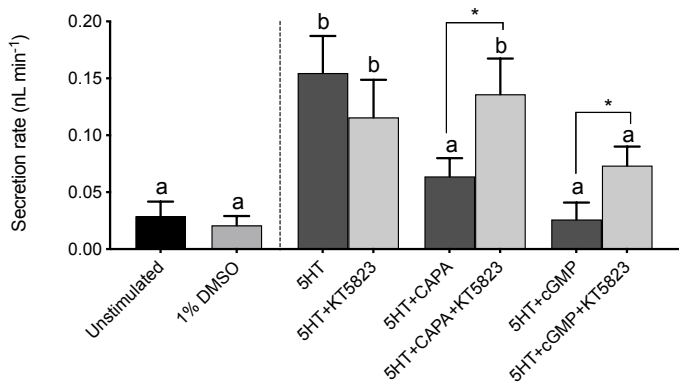

**A**

```

1   cgaacgcgatttcagctgaagatcacttggagcagattctaattcttgggctctgtcgtgagttttgtgattttggagtggtggaagca
90  aggaatcagccagaaaaaggtagtaaatgactgcttttgtgtgaaattgttgcctagcgtgacaaagatgatttgtgaaaaagctaa
180 atgcatgtgtgacgcggcaggggctgtatgtgaacatgctgcctgggtcgaccaaatgagtaactgagtgaaagtgttttgattaat
270 tgaggttaaccgcaacgggtgattgaagtgacggttatgatgttgcagcatcgcttttatgcggaagatcttggcgcgcaaccctgaaga
360 accgttccttggagcaaatctcagtgacgcgaaataaattagaaaaatgtgaacacagatttatcgctaatgaaaaacagtttcttatc
450 actatttataagaggacgcaagatcgaaaaagggtgcaacaggggaagaaaaaagtaaagagcgaattggctccttgttggctgcta
540 gaagaaaaacggcgtaagtgatccccaatgcatttatgaaaaaacctgaagagaagaaagtgatcccaagtgctggttgggaaca
630 aaatgattacaaaagctcattcggctcggtaagtggtgaaaaattgtttcaacgctcgtttataccgcttttctcaaaacttatta
720 cggcgaaggagcgggaagcaaaaaaagaagtgatgtcggttactgggtgacgaagcagatggttacttaaagtggaacactcaatt
810 cgagacagcgaataaatttctgctgcaaatctcgctgcctctttgtacctgtaggacggtgtgcgaacggcgtggagtcaccaagtcagg
900 atgactttccacaacttcgacgacgtggcagtgccagtagatcgtactggacaaaccgcaaacactctgacagaccagaccacc
M T F H N F D D V G S G T I E S Y W T N A A T T T A R R T T T T 30
990 ctcctcacagcacttctgacgacttcctcgggacgtcatcgtcgaacttgggtgttgttccatcgaccgccacatccaccttgcctggat
L L T A L L T T S L G T S S E L L G V V P S T A A T S T L L L D 60
1080 accggttggtagctactacggaatggcaccgctgsgagggatcagctggttagctgaggtggccattcaccggtgaaactat
T G W W T D Y G N G T A L E G Y A G V S A R W P F T G E N Y 90
1170 tcgaccacggaatcatggactcaccggagcggaggaatcgtaccaccgtacgaccggtgtgatccaagaaacgaaaacttccagtgc
S T H G N H G L T G A E E I V P P Y D R C D P R N E N F Q Q 120
1260 accgtgcagagtttctgagtagcggcgggaccggagcggctgctgacagcggctggttggaccattcttcaacgggac
T V Q E F L E Y A R G P Q Q M P L S T A L L V T I L F T G I 150
1350 ctcattaccggcgtcgtgggcaatttgattgtgtgtcgtgtaataatcgacatcctcagatgcaacaccgccaactactatctgttc
L I T G V V G N L I V C L V I I R H P Q M H T A T N Y Y L F 180
1440 agtttggcgtatccgatttgatctgttctgttggctgctgctacgaatcgacagccttactgaccactacccgtcaactggg
S L A V S D L I L L L L G L P Y E I S L Y W H Q Y P Y N L G 210
1530 ttggtgttctgcaaaatgcgcgctctcatgctcggagggatcgacttacgtgctggtgttgacgatagtgccctttcgtatggaacggtt
L V F C T C K M R A L M S E A S T Y V S V L T I V A F S M E R F 240
1620 ctggccatctgcatcattgcactgacacatgctcgggtgacggttgcgcatcattgcccggcctctggatcgtcagctctc
L A I C H P L H L Y T M S G L Q R P V R I I A G L W I V S L 270
1710 ttacgagcagtgcttttgcgctgtcaccgatatcgattacattctctaccaccgcaccaagagaaaaatcgaggactcggctttctgt
L S A V P F A V F T D I D Y I L Y P P T Q E K I E D S A F F 300
1800 gcgatgcttagcaatccggaaggaaatccctgtgggagctgtcgcacatgctgttttccgcccggcagtggtggtgatgtagtactc
A M L S N P E G I P L W E L S T C L F F A G P M V V M I V L 330
1890 tacggccggatgggaatcgaatccgctcccgaacgcaacgcaacggaggaatgggggtgcgaaatggttcattaacggctcaaggta
Y G R M G M Q I R S R T Q R T E E L G V R N G S I N G S P K G V 360
1980 tctcagtcgaaaaaggcgattatccggatgctagctgcccgttgtgataacgttctttgtgtgctggggcggcttccagcccagaggtg
S Q S K K A I I R M L A A V V I T F F V C W A P F H A Q R L 390
2070 ctcttctgtacgcgggagctggaacacttcaaacgctcaatcgtggctgttttccgctggggatgctgactactgttctgtgc
L F L Y A R D W Q H F N T V N T V L F S V A G W L Y Y V S C 420
2160 accgtcaatcccattcctgtacaacgtgatgtcccaccggtatcgggtcgttctccgggagacacttggggcggcggcgaggttggc
T V N P I L Y N V M S H R Y R V A F R E T L C G R R R G F G 450
2250 accagctttggcgggatcaatcgagcttccgcgaaacgacggttgacgtgaaacgtggctgagagctccaagctctccgggctcga
T S F A R D Q S F R E T T V D V N L G C E S K L L R A R 480
2340 tcgatgatgcaatctagcaaacggtcccgtcaaaaggcgtctctacacgtccaacagcgtgagatacagtgggcaccattacatccgg
S M M Q S S K R S R Y K G A L Y T S N S V R Y S G D H Y I R 510
2430 cggaaactccctcagatggggcggccacatccgggaagtcgcccgtcgtctcaccnaaacatgccaagcagcgtcgtggtcatgctgga
R N S L Q M G G H I P G S R A S L S P N M P S D V V V M L E 540
2520 aacaagcttagcggctgagcagcttctacaccacatcgccctcaacgctgacgacgtccacaacgacgaccacgatgaccaccgccacc
N K L S G R A R C Y T T S A S T L T T S T T T T M T T A T 570
2610 accgggaaaaactcctcaaggtaccctgataagcatcaacggtggcagggctgctcgtcaacaataatgtaaatagcatcaacaac
T G E N I L K V P L I S I N G G T G C L V N N N V N S I N N 600
2700 aactccaccaataacgccatcattcccaccgacaacagcaacaacatcaaccgtagcattagcaaggaaaacacctttccaacgcattc
N S S T T N A I I G P T D N S N N I N R C S I S K E N N L S N A S 630
2790 acccgggttccttcccgggctgaccagcagcctgtcaatgaaatggcactcgataaccagcaacaacgccacccaaccgg
T P V P S S R A S T S S L S I E M A L D T S S K Q P P P N R 660
2880 aacgacttatccctgctgaccgaacagacagcaacgattcccaccagcaccatcctcaacgacatcccaatcctaatcatcaattaatt
N D G L S A L S D R T D S N D S H Q H G P Q Q H P A N P N H Q Q L I 690
2970 aacgctacggaagcgaataaagcgtcctgctggaagtgctgtagctgtagctgtagctgtagctgtagctgtagctgtagctgtagctg
N G Y G S D K S A S P A G S A V M R E T C I * 712
3060 ccaccaccgaggctccgctaaacaggtagacaacgacatcccaagaaatagccgcatggtcagctcagatcaggaatgaaacccggaagc
3150 aacagcgttaaaagcttgcctgcttcaattatagatatttgcgaactgtagcaactgtagcaactgtagcaactgtagcaactgtagcaactg
3240 tagtcgatatgagtaaaaacgagcgggaaatgctgcaatgaaatgaaataaacttttaccgttcaacgcttcgctcagcgaatcagcga
3330 acttcaaaagcagtttttatgttcaaaactattattcagtgaaaatgtgttcaactgtggttgcgttggacaatagaataaagtgatcata
3420 ttttcta(n)

```

**B**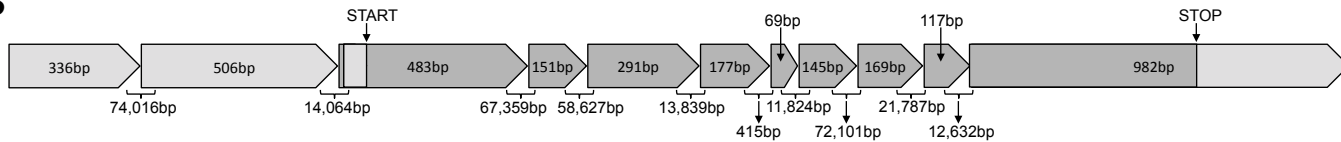

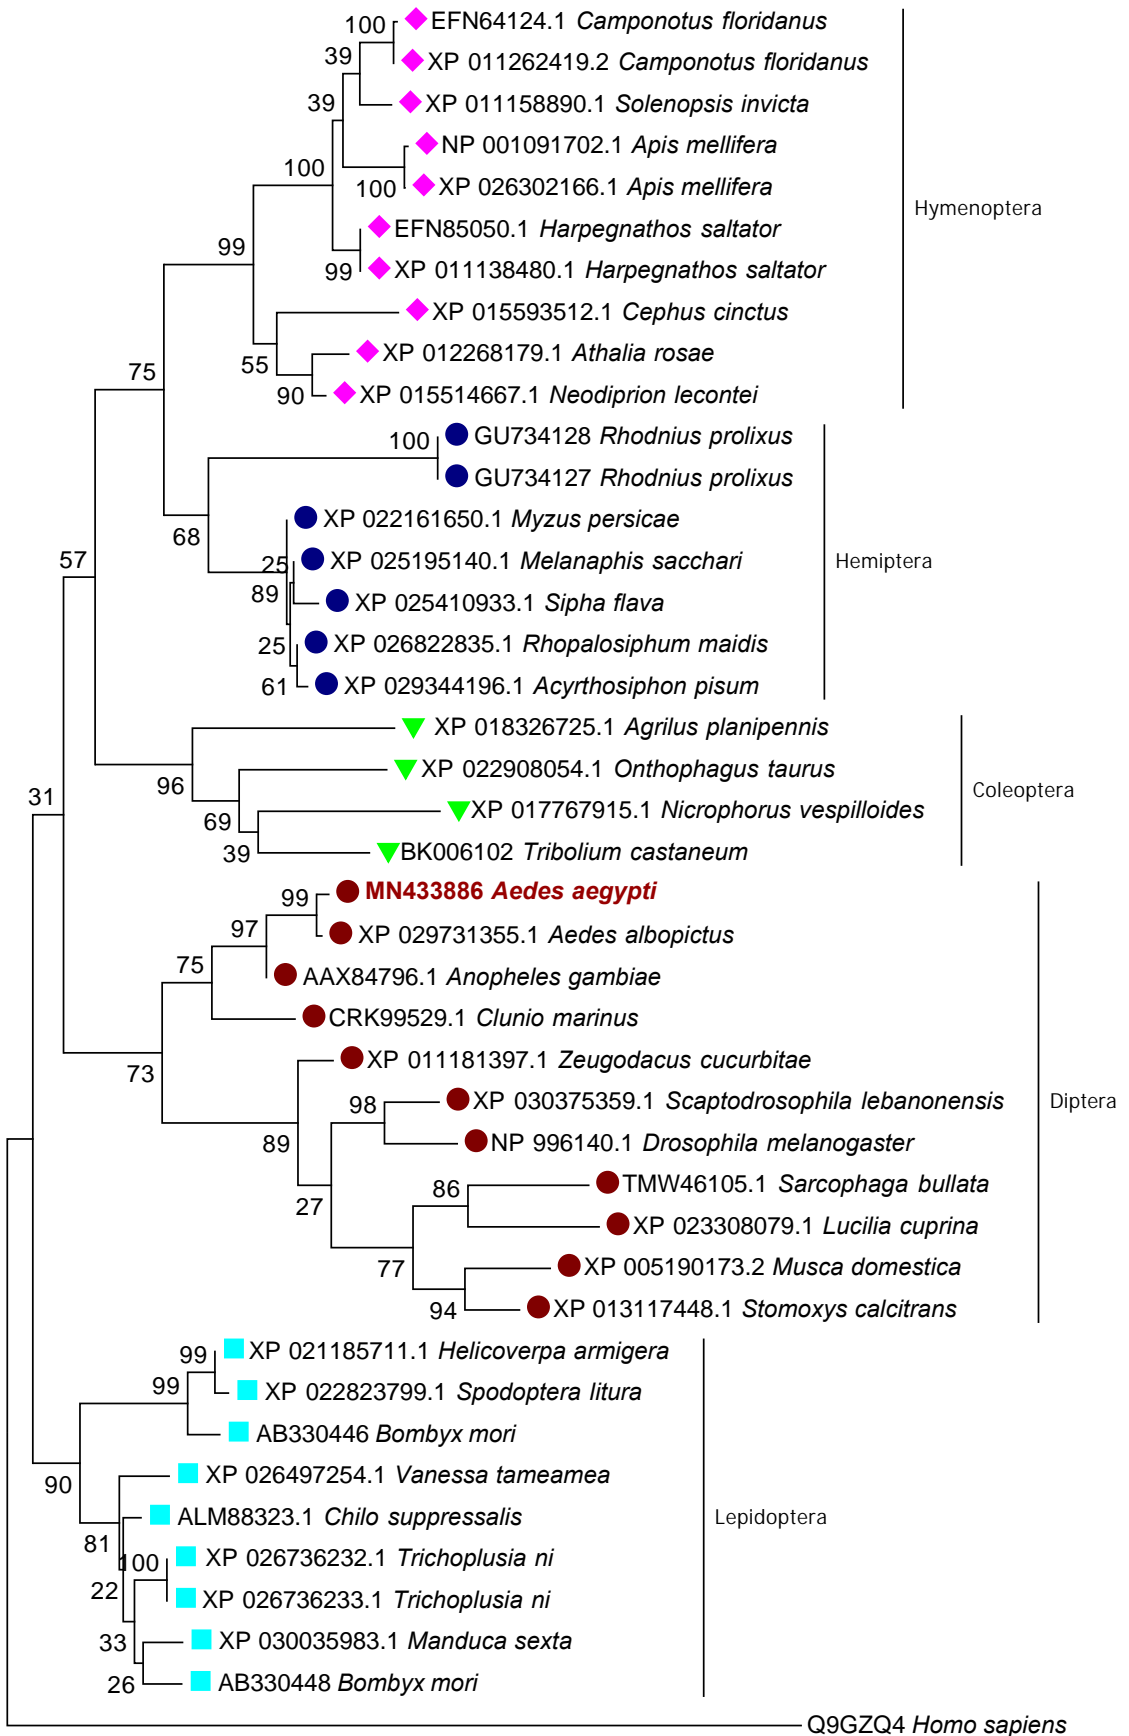



A

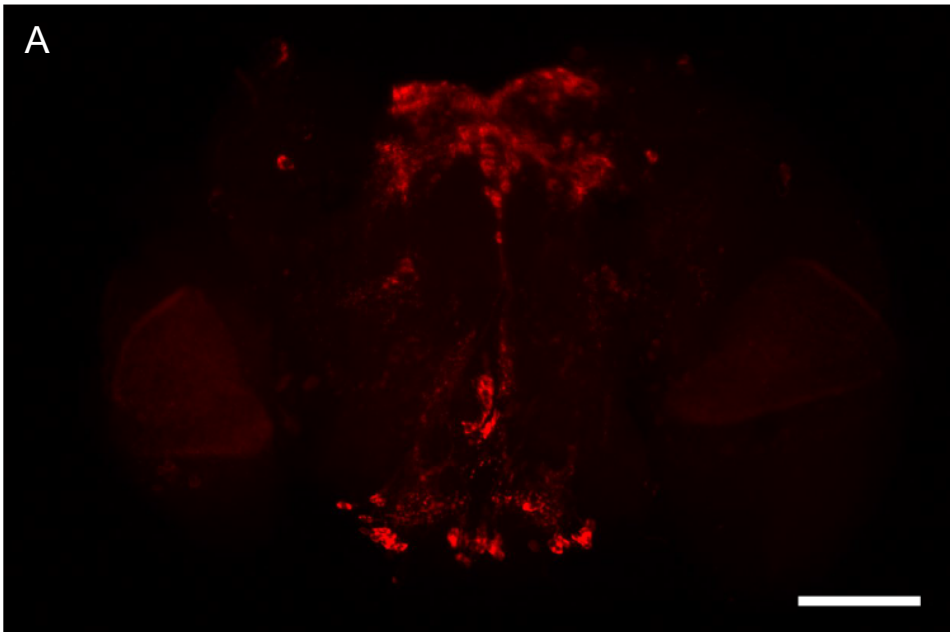

B

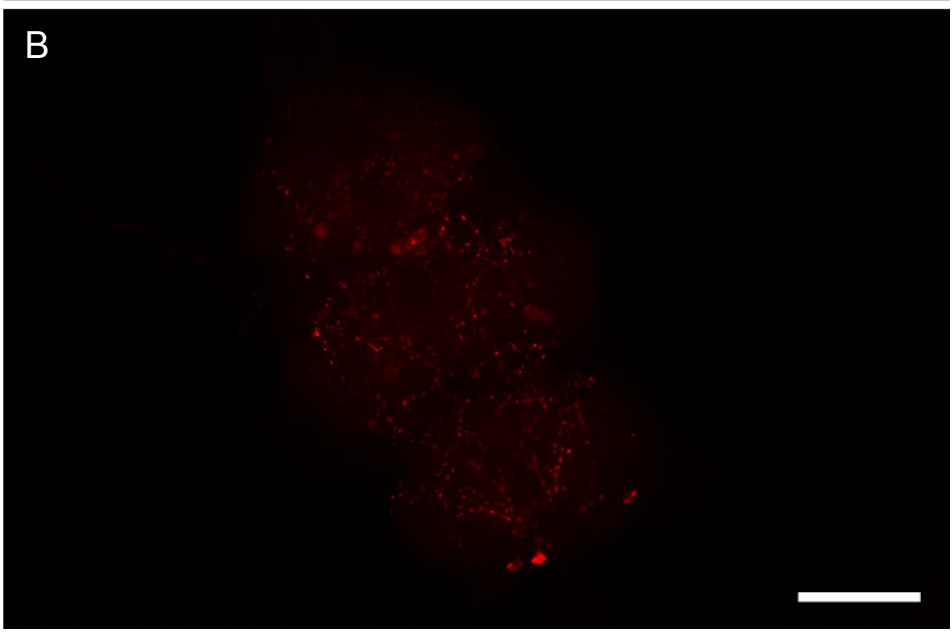

**A**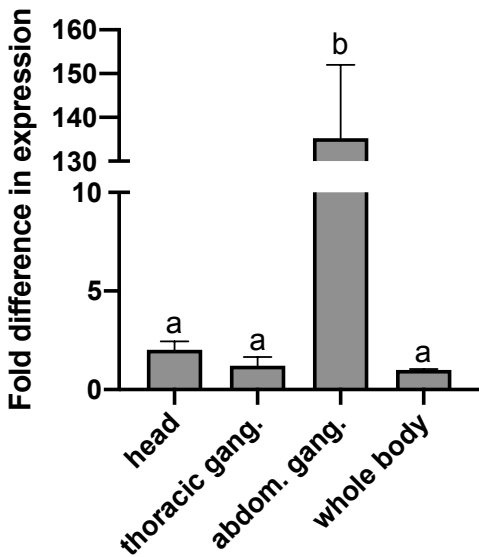**B**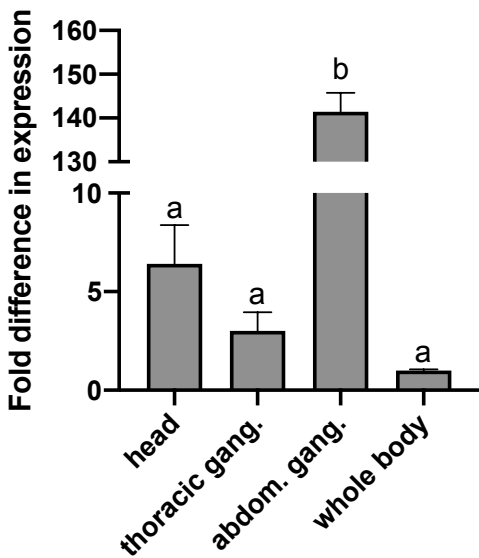

Source: https://www.biorxiv.org/content/10.1101/799833v1.full.pdf
